# Supplementary material for: A Comprehensive HPTLC-Based Analysis of the Impacts of Temperature on the Chemical Properties and Antioxidant Activity of Honey
Source: MDPI journal article supplement (doi:10.3390/molecules27238491), 2022-12-02
Supplement: s1 [file s1]

*Supplementary Material*

# **A Comprehensive HPTLC-Based Analysis of the Impacts of Temperature on the Chemical Properties and Antioxidant Activity of Honey**

**Md Khairul Islam <sup>1,2</sup>, Tomislav Sostaric <sup>2</sup>, Lee Yong Lim <sup>2</sup>, Katherine Hammer <sup>1,3</sup> and Cornelia Locher <sup>1,2,\*</sup>**

<sup>1</sup> Cooperative Research Centre for Honey Bee Products Limited (CRC HBP), University of Western Australia, Perth 6009, Australia;

<sup>2</sup> Division of Pharmacy, School of Allied Health, University of Western Australia, Perth 6009, Australia

<sup>3</sup> School of Biomedical Sciences, University of Western Australia, Perth 6009, Australia

\* Correspondence: [connie.locher@uwa.edu.au](mailto:connie.locher@uwa.edu.au)

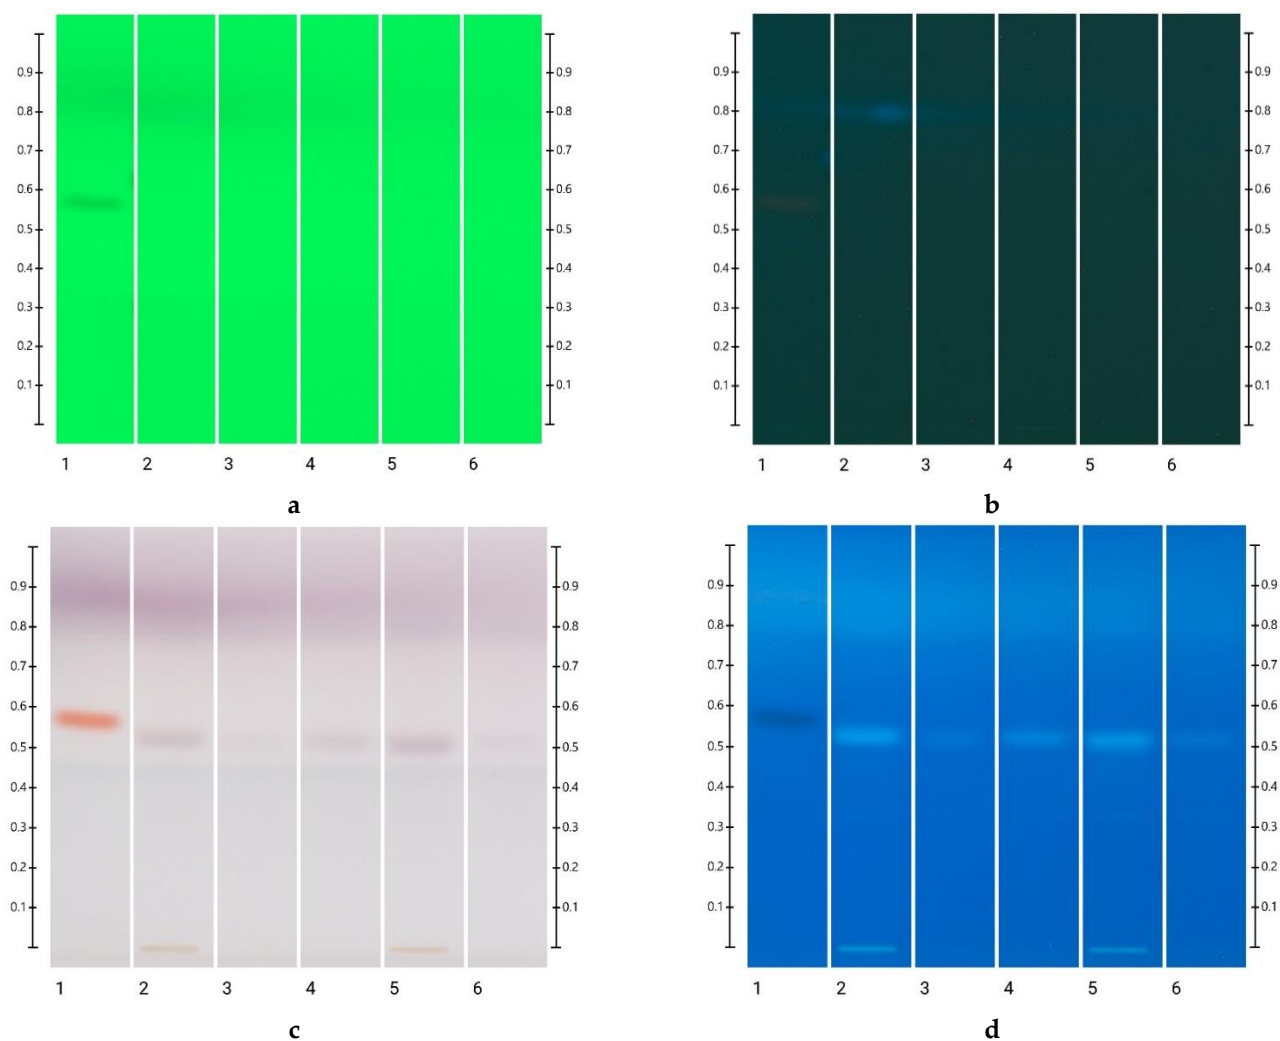

**Supplementary Figure S1.** ART short-term storage at 40 °C; images taken at (a) 254 nm; (b) 366 nm; (c) White light after derivatisation and (d) 366 nm after derivatisation with vanillin reagent; Track 1—4,5,7-trihydroxyflavanon, Track 2—0 h, Track 3—6 h, Track 4—12 h, Track 5—24 h, and Track 6—48 h; 5  $\mu$ L of each honey extract respectively.

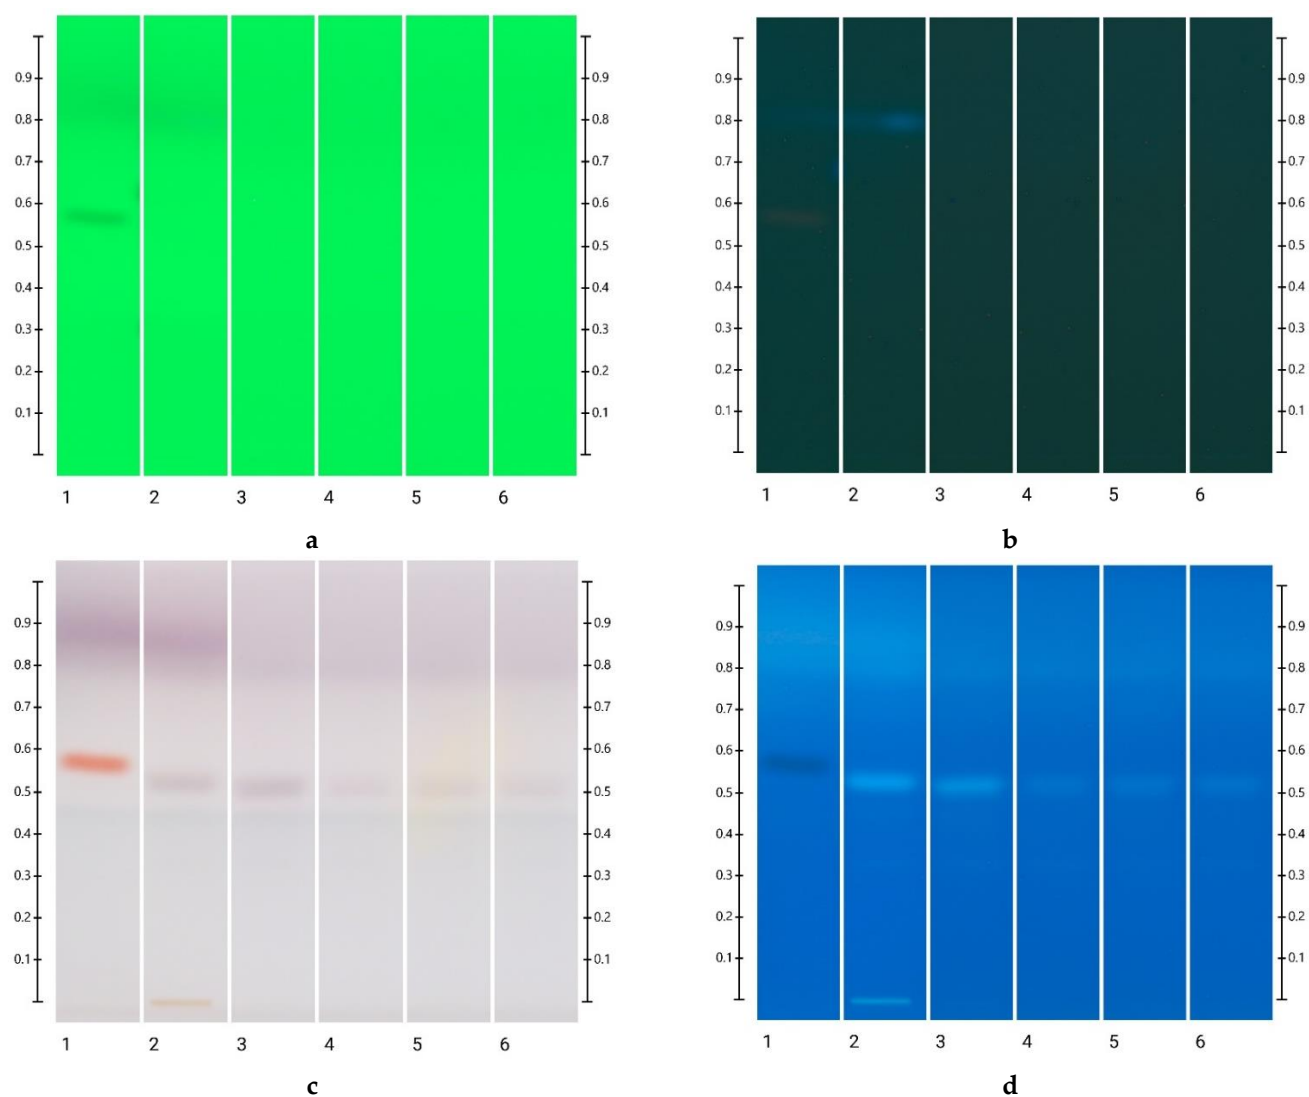

**Supplementary Figure S2.** ART short-term storage at 60 °C; images taken at (a) 254 nm; (b) 366 nm; (c) White light after derivatisation and (d) 366 nm after derivatisation with vanillin reagent; Track 1 – 4,5,7-trihydroxyflavanone, Track 2 – 0 h, Track 3 – 6 h, Track 4 – 12 h, Track 5 – 24 h, and Track 6 – 48 h; 5  $\mu$ L of each honey extract respectively.

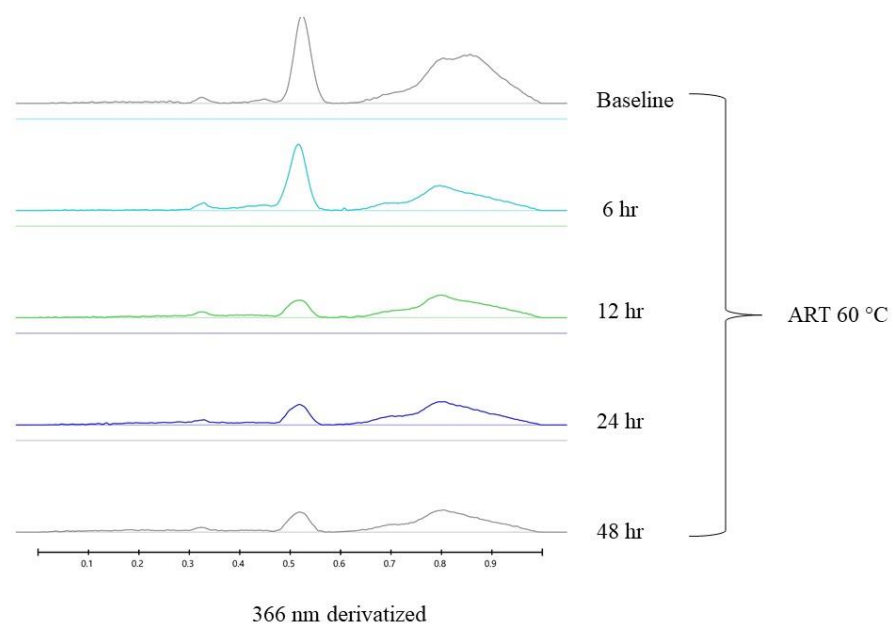

**Supplementary Figure S3.** Organic honey extract chromatograms (offset Y-axis values).

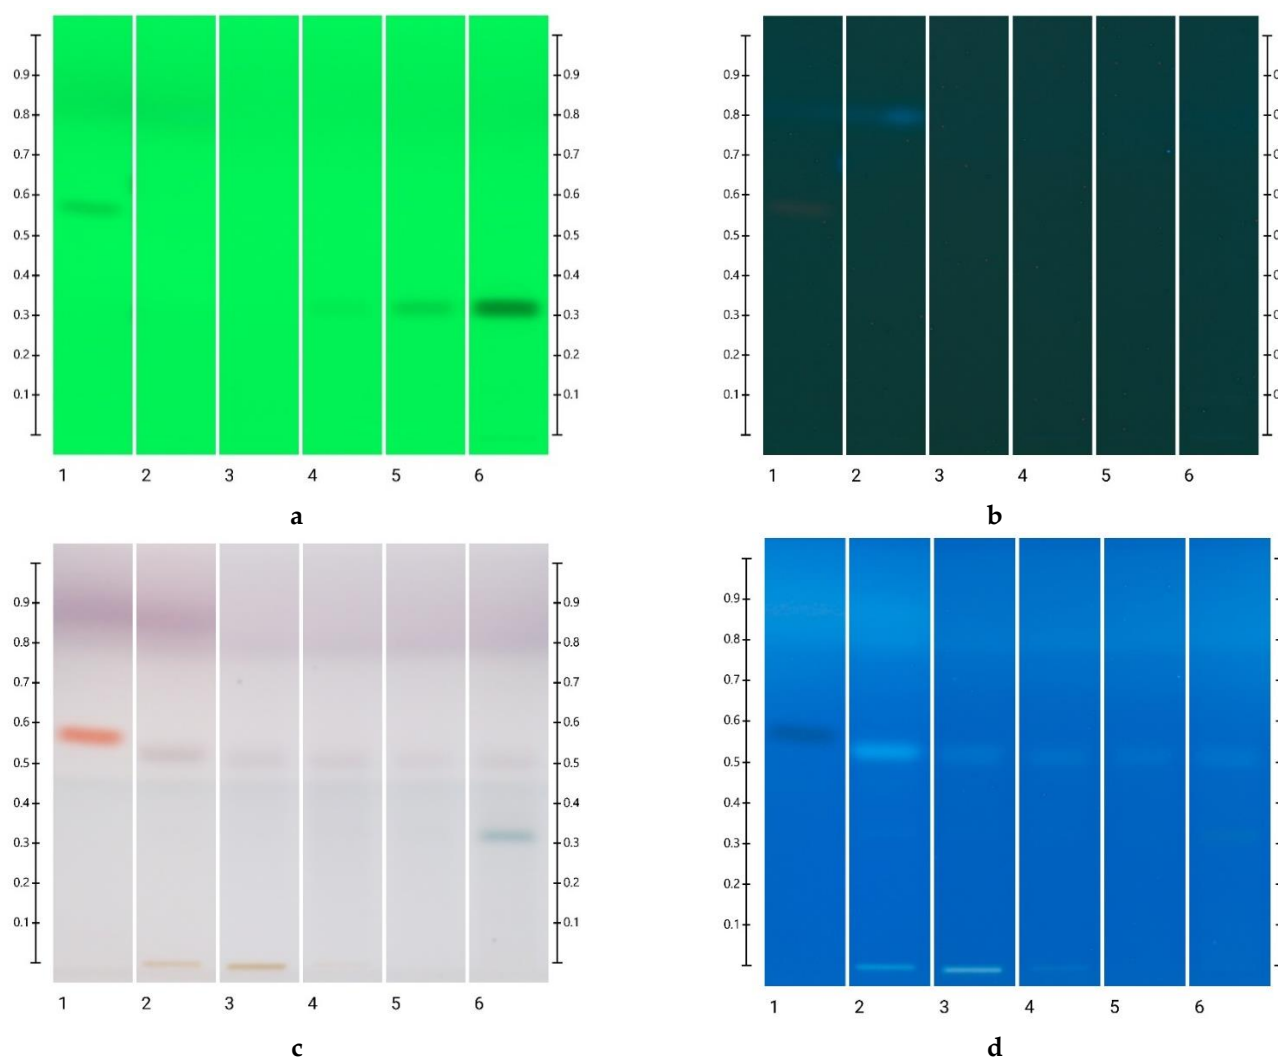

**Supplementary Figure S4.** ART short-term storage at 80 °C; images taken at (a) 254 nm; (b) 366 nm; (c) White light after derivatisation and (d) 366 nm after derivatisation with vanillin reagent; Track 1 – 4,5,7-trihydroxyflavanon, Track 2 – 0 h, Track 3 – 6 h, Track 4 – 12 h, Track 5 – 24 h, and Track 6 – 48 h; 5  $\mu$ L of each honey extracts respectively.

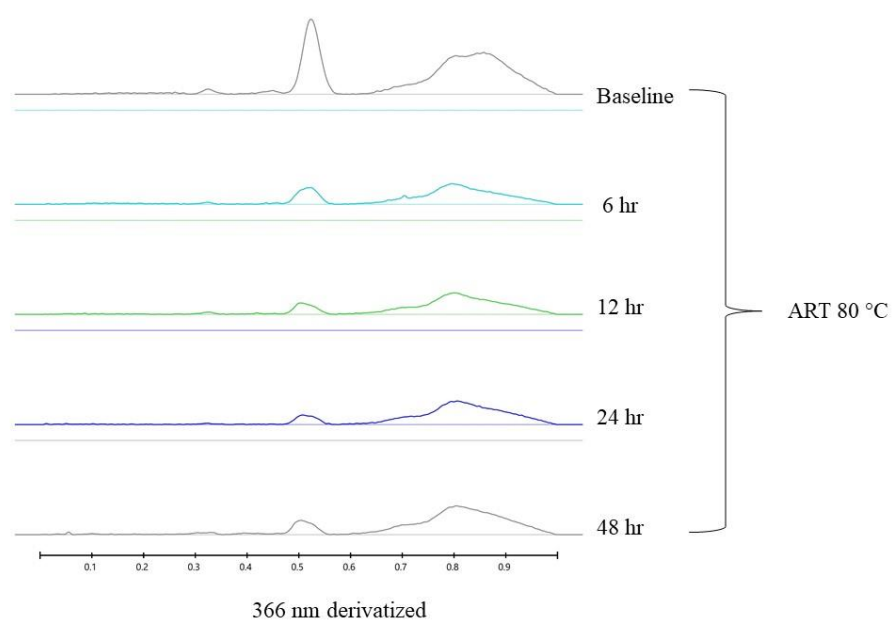

**Supplementary Figure S5.** Organic honey extract chromatograms (offset Y-axis values).

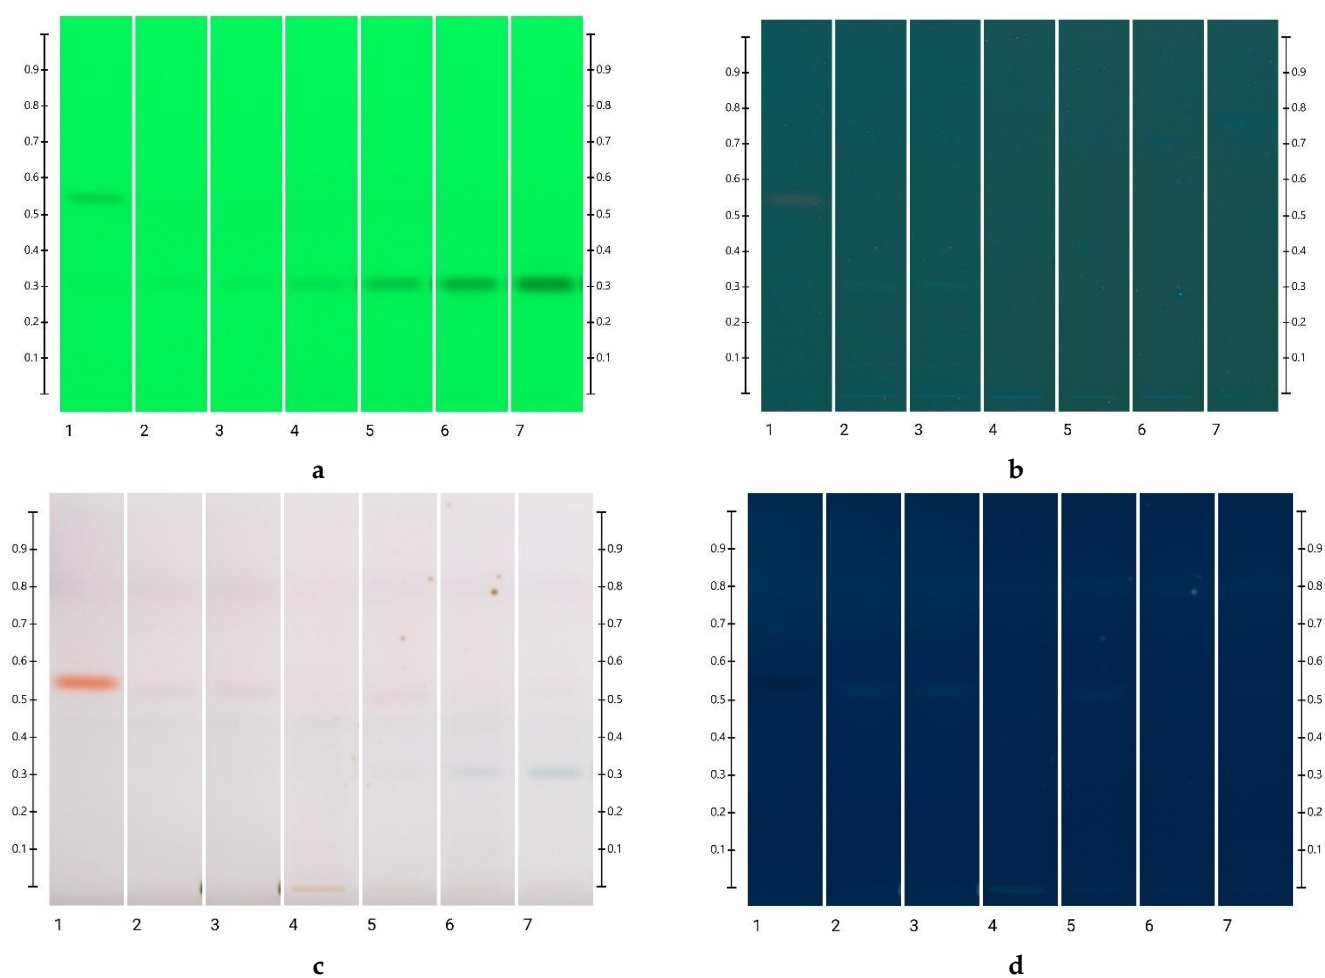

**Supplementary Figure S6.** ART long-term storage at 40 °C Images taken at (a) 254 nm; (b) 366 nm; (c) White light after derivatisation and (d) 366 nm after derivatisation with vanillin reagent; Track 1—4,5,7-trihydroxyflavanon, Track 2— 0 h, Track 3— 1 month, Track 4— 2 month, Track 5— 3 month, Track 6— 4 month, and Track 7— 5 month; 5  $\mu$ L of each honey extract respectively.

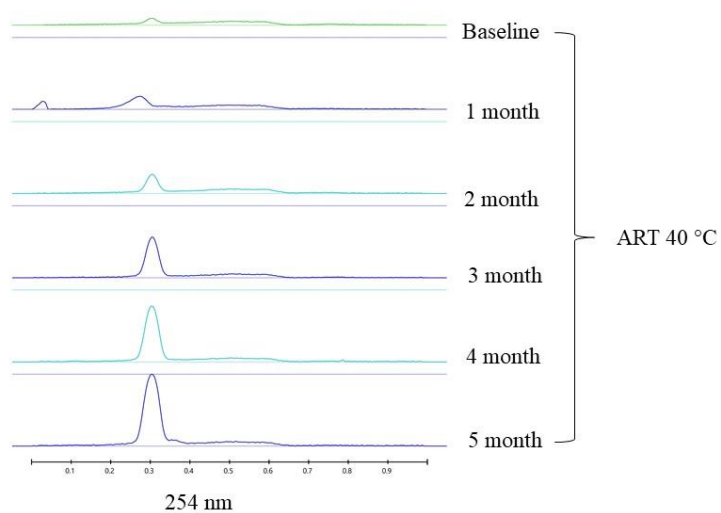

**Supplementary Figure S7.** Organic honey extract chromatograms.

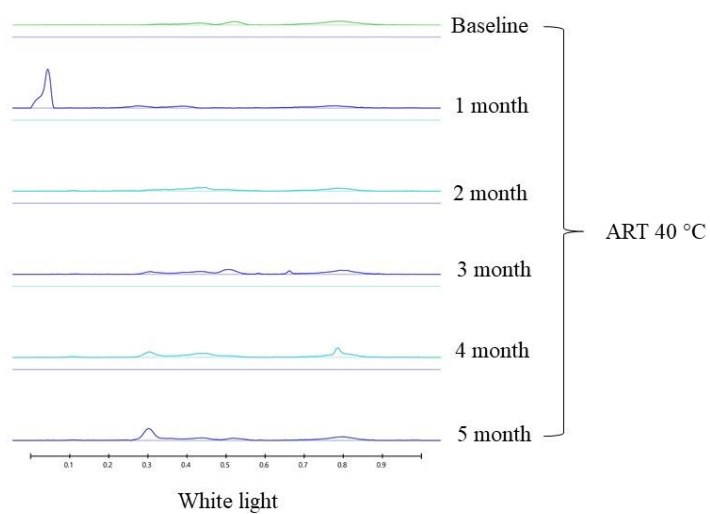

**Supplementary Figure S8.** Organic honey extract chromatograms.



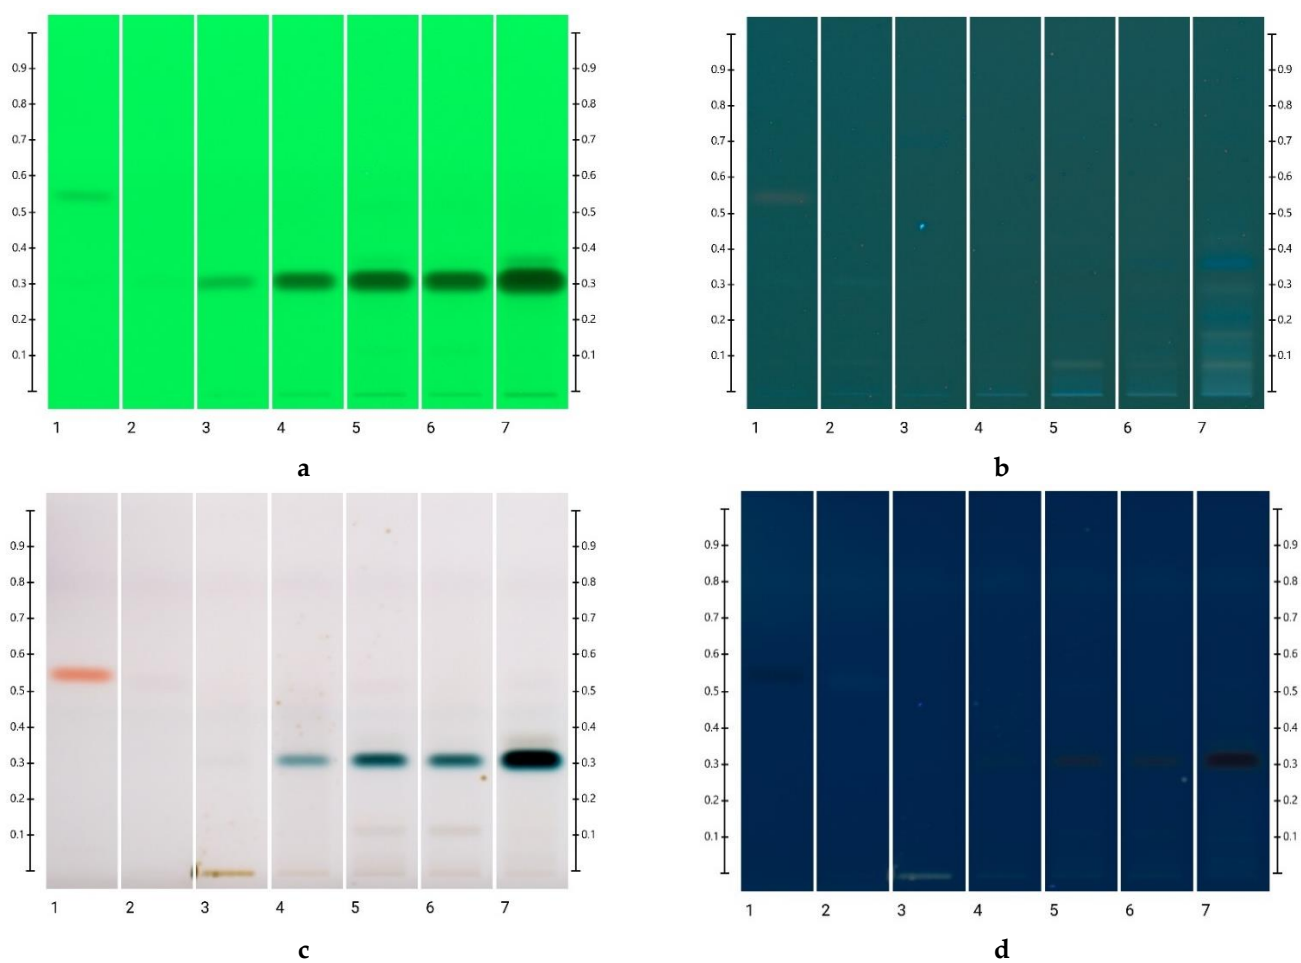

**Supplementary Figure S9.** ART long-term storage at 60 °C Images taken at (a) 254 nm; (b) 366 nm; (c) White light after derivatisation and (d) 366 nm after derivatisation with vanillin reagent; Track 1—4,5,7-trihydroxyflavanon, Track 2— 0 h, Track 3— 1 month, Track 4— 2 month, Track 5— 3 month, Track 6— 4 month, and Track 7— 5 month; 5  $\mu$ L of each honey extract respectively.

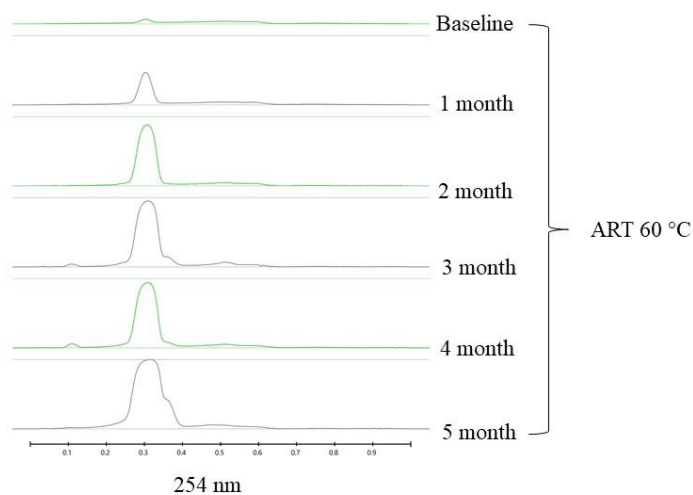

**Supplementary Figure S10.** Organic honey extract chromatograms (offset Y-axis values).

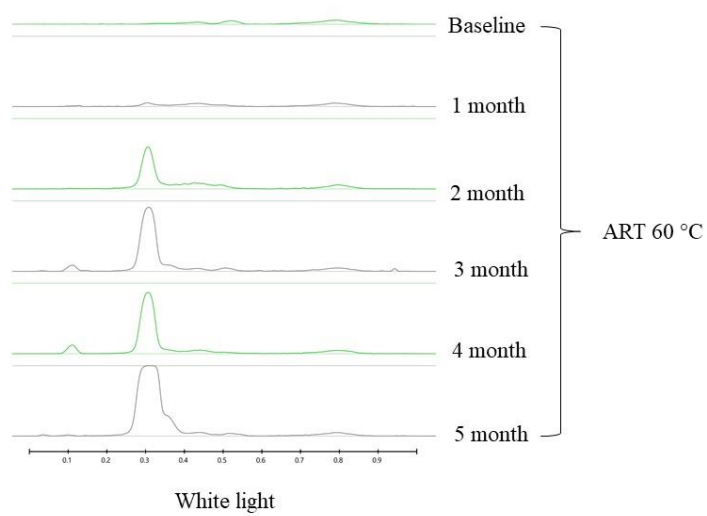

**Supplementary Figure S11.** Organic honey extract chromatograms (offset Y-axis values).

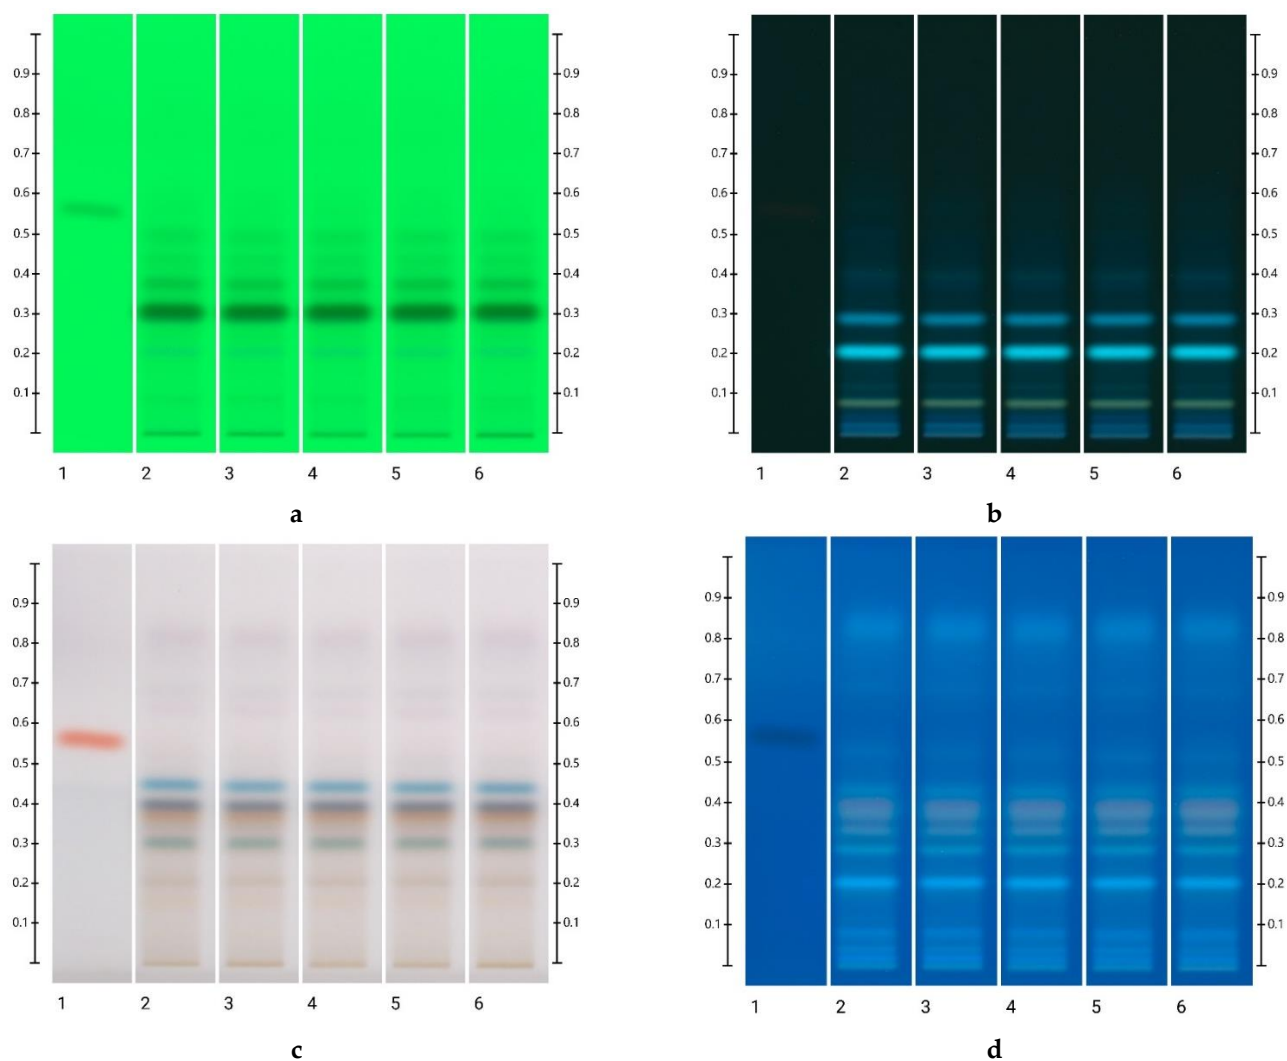

**Supplementary Figure S12.** LEP short-term storage at 40 °C; images taken at (a) 254 nm; (b) 366 nm; (c) White light after derivatisation and (d) 366 nm after derivatisation with vanillin reagent; Track 1 – 4,5,7-trihydroxyflavanone, Track 2 – 0 h, Track 3 – 6 h, Track 4 – 12 h, Track 5 – 24 h, and Track 6 – 48 h; 5  $\mu$ L of each honey extract respectively.

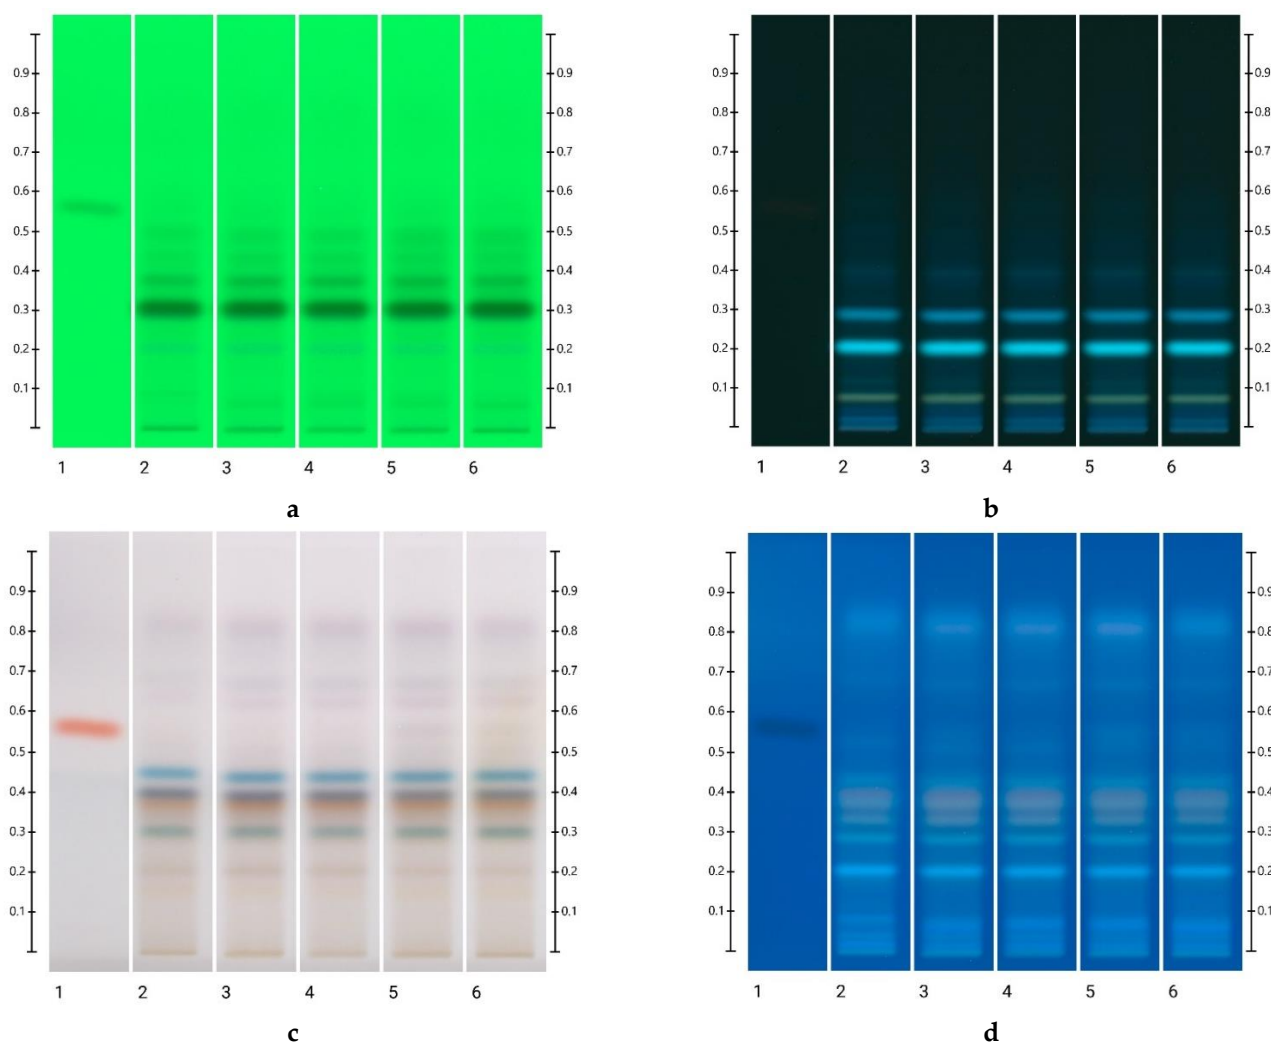

**Supplementary Figure S13.** LEP short-term storage at 60 °C; images taken at (a) 254 nm; (b) 366 nm; (c) White light after derivatisation and (d) 366 nm after derivatisation with vanillin reagent; Track 1 – 4,5,7-trihydroxyflavanon, Track 2– 0 h, Track 3– 6 h, Track 4– 12 h, Track 5– 24 h, and Track 6– 48 h; 5  $\mu$ L of each honey extract respectively.

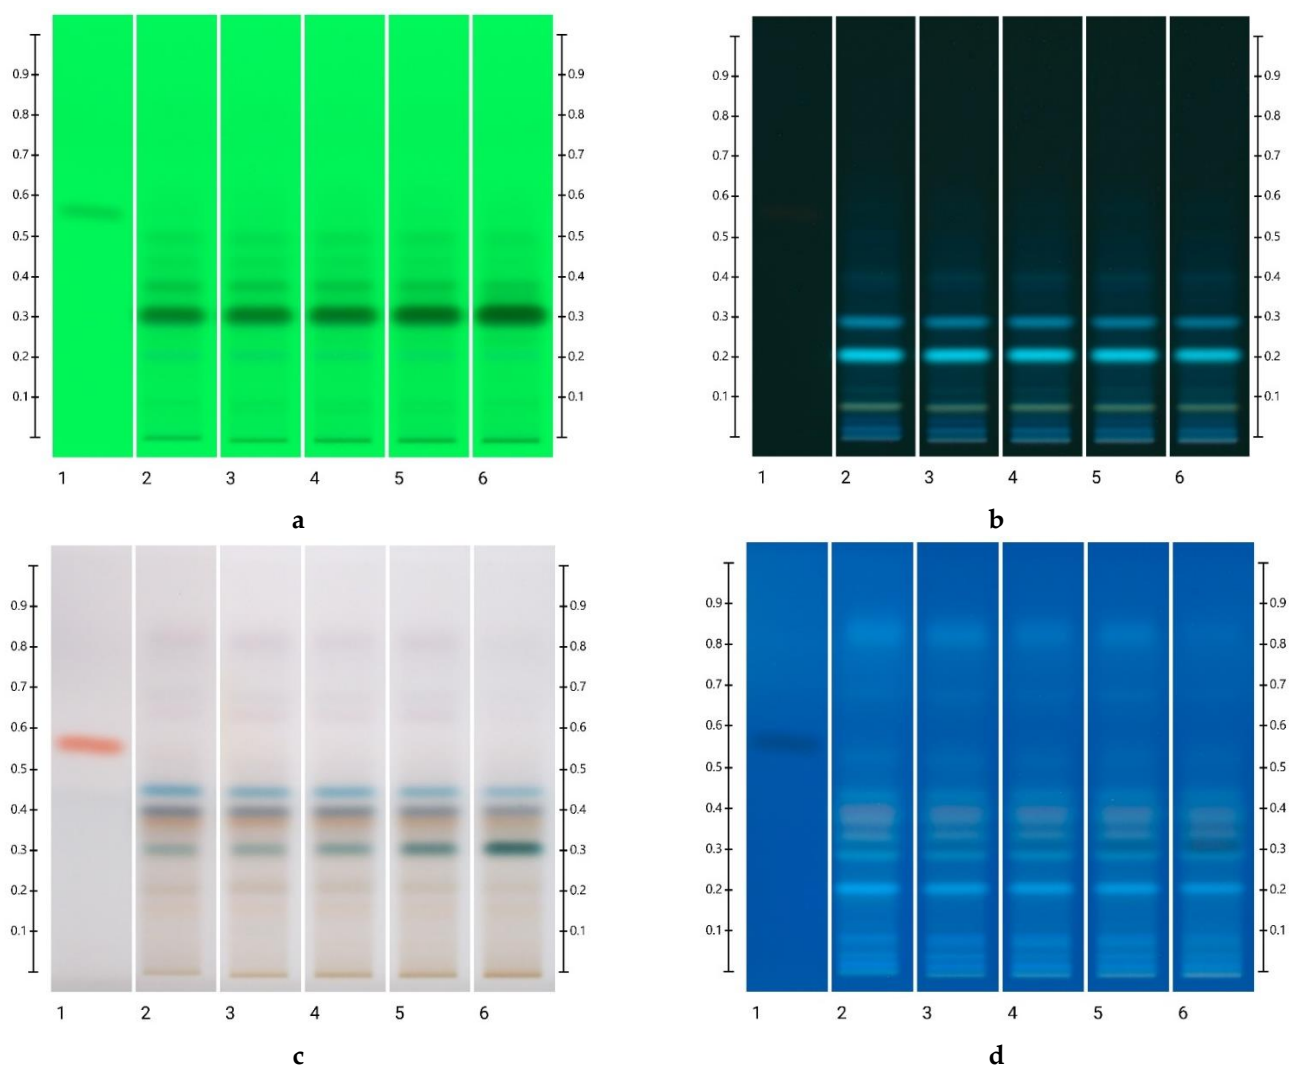

**Supplementary Figure S14.** LEP short-term storage at 80 °C; images taken at (a) 254 nm; (b) 366 nm; (c) White light after derivatisation and (d) 366 nm after derivatisation with vanillin reagent; Track 1 – 4,5,7-trihydroxyflavanon, Track 2– 0 h, Track 3– 6 h, Track 4– 12 h, Track 5– 24 h, and Track 6– 48 h; 5  $\mu$ L of each honey extract respectively.

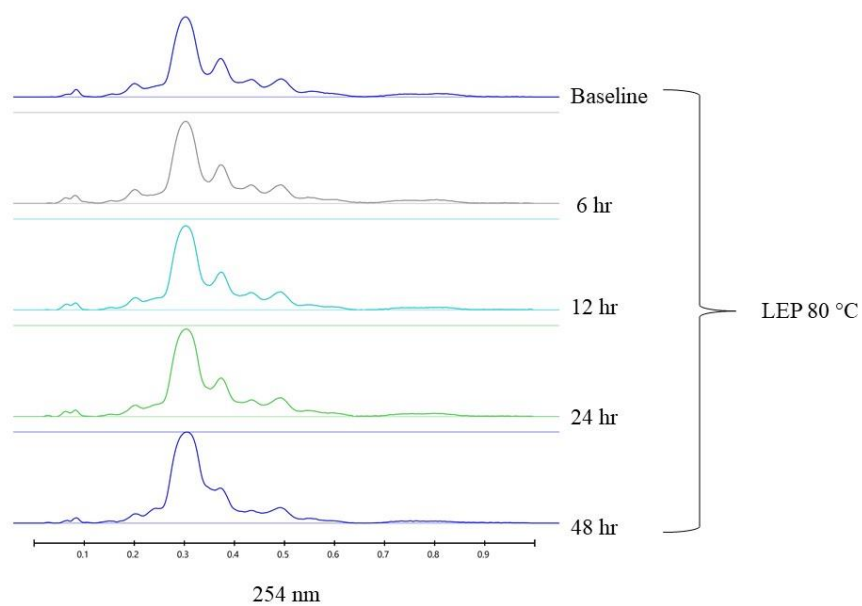

**Supplementary Figure S15.** Organic honey extract chromatograms (offset Y-axis values).

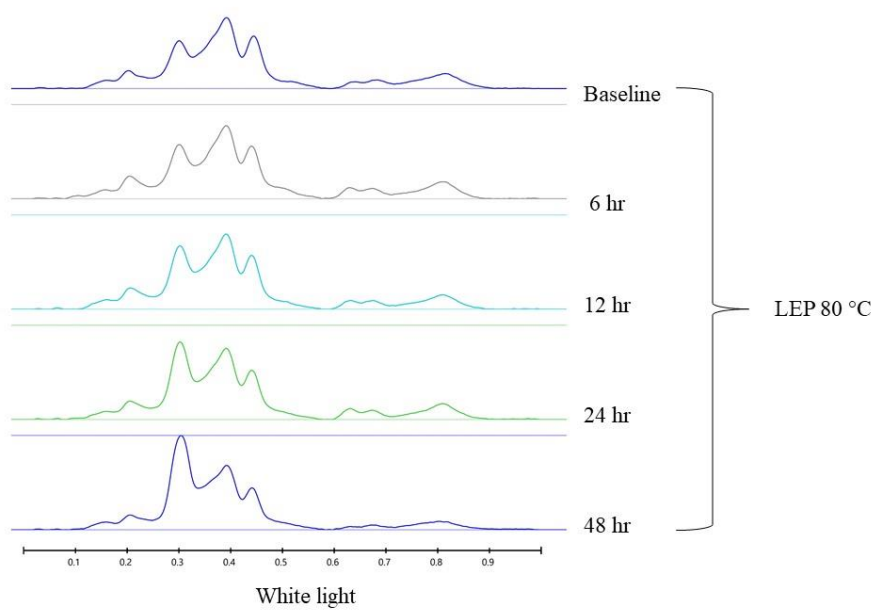

**Supplementary Figure S16.** Organic honey extract chromatograms (offset Y-axis values).

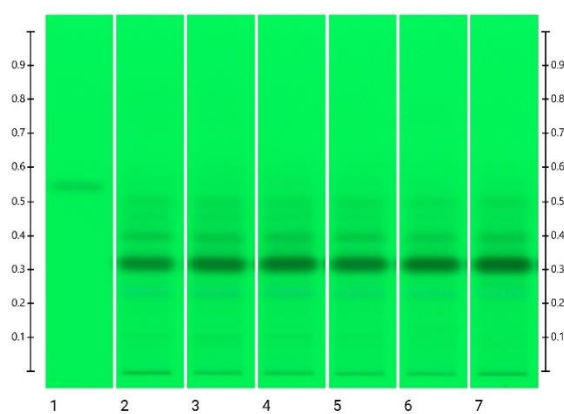

**a**

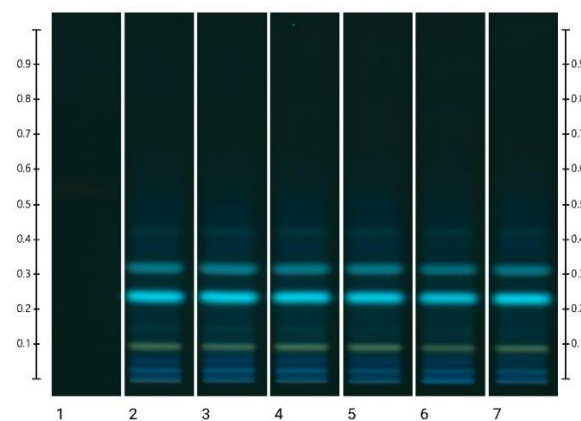

**b**

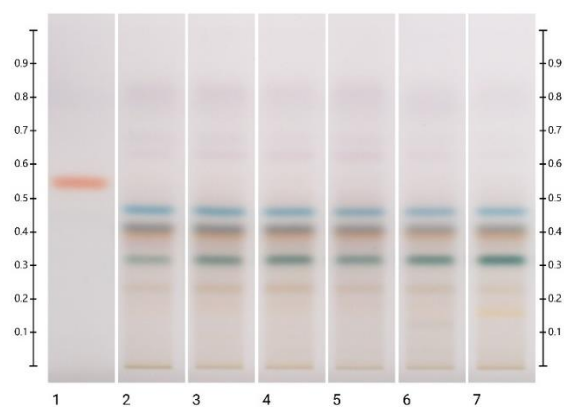

**c**

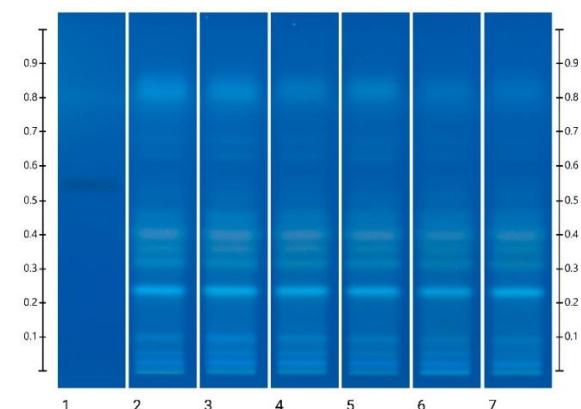

**d**

**Supplementary Figure S17.** LEP long-term storage at 40 °C Images taken at (a) 254 nm; (b) 366 nm; (c) White light after derivatisation and (d) 366 nm after derivatisation with vanillin reagent; Track 1—4,5,7-trihydroxyflavanon, Track 2— 0 h, Track 3— 1 month, Track 4— 2 month, Track 5— 3 month, Track 6— 4 month, and Track 7— 5 month; 5  $\mu$ L of each honey extract respectively.

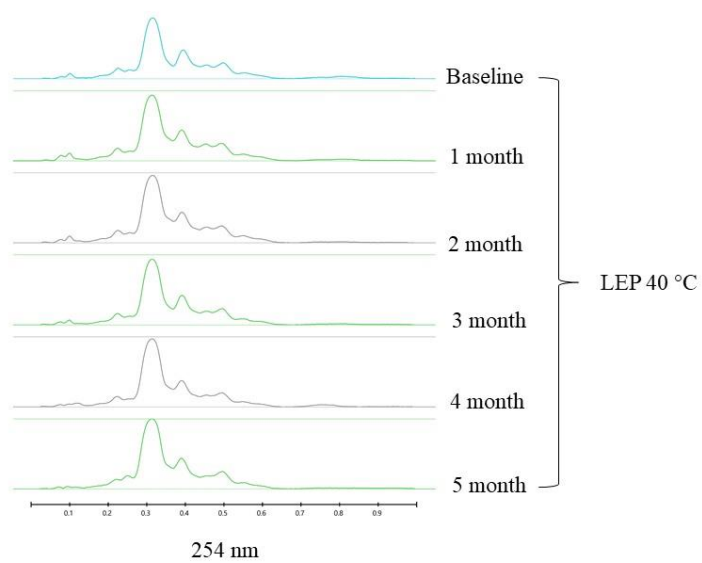

**Supplementary Figure S18.** Organic honey extract chromatograms (offset Y-axis values).

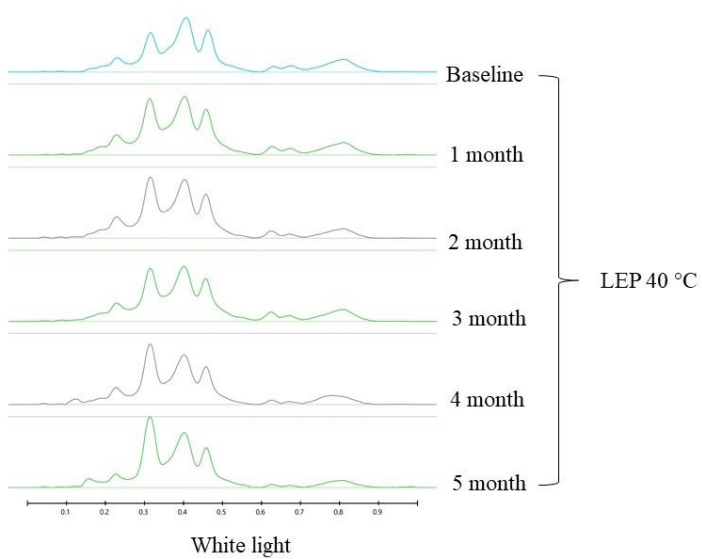

**Supplementary Figure S19.** Organic honey extract chromatograms (offset Y-axis values).



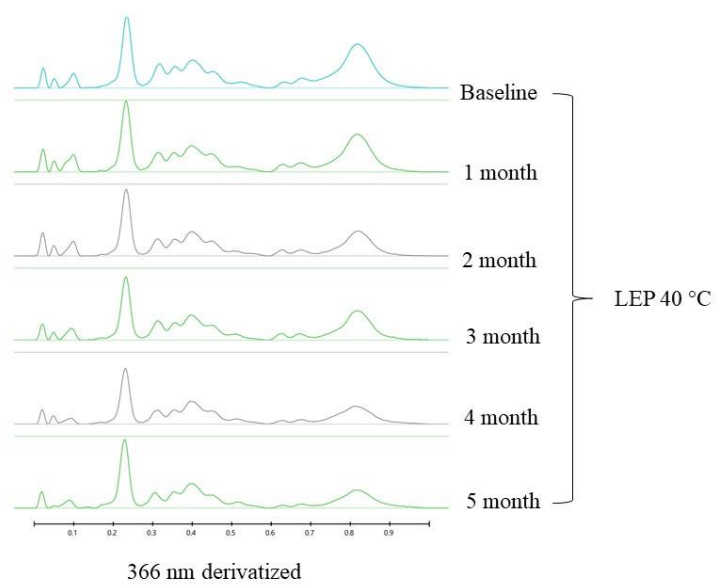

**Supplementary Figure S20.** Organic honey extract chromatograms (offset Y-axis values).

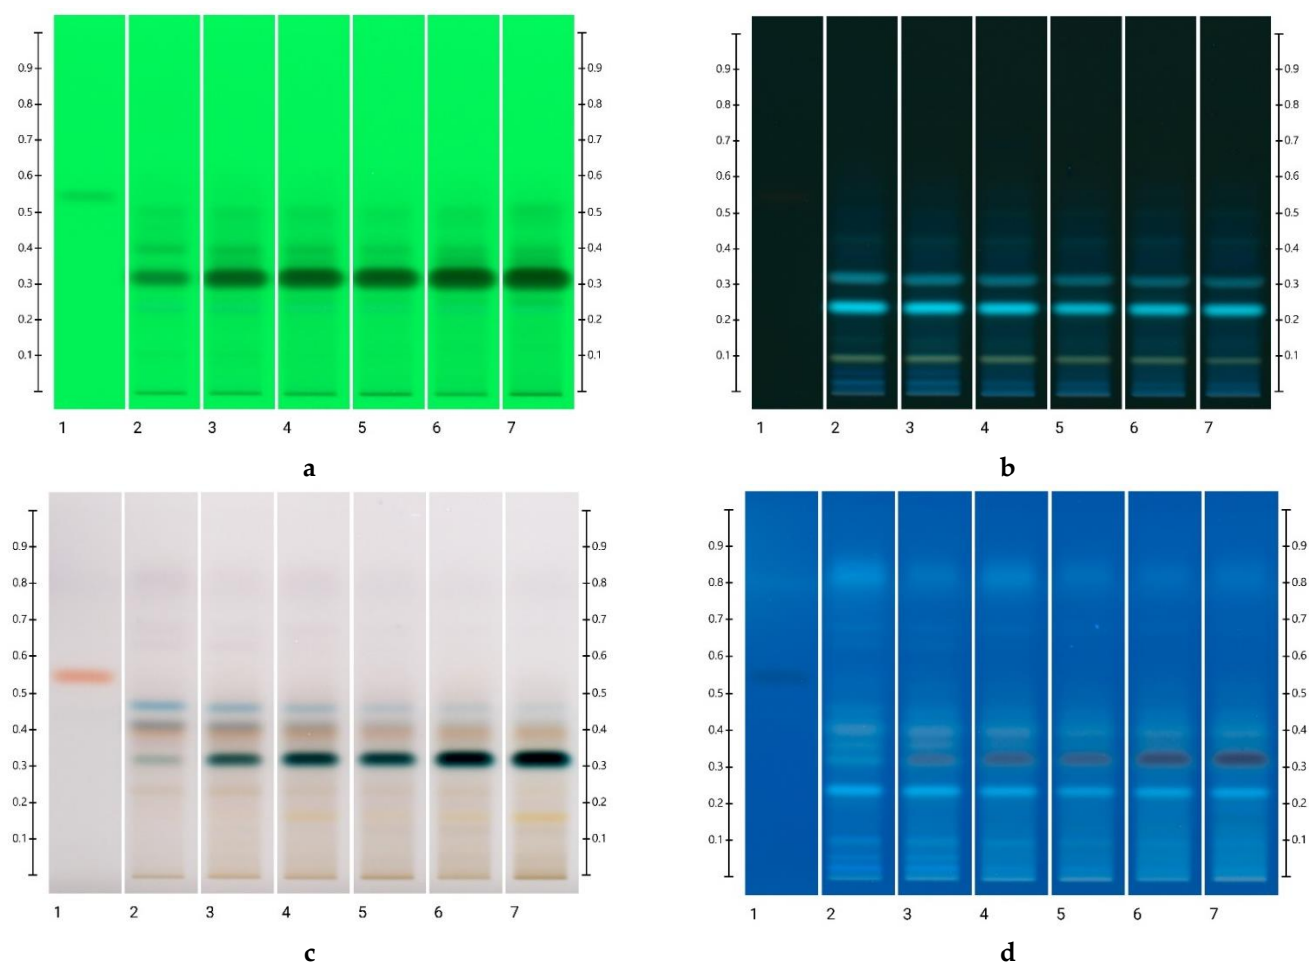

**Supplementary Figure S21.** LEP long-term storage at 60 °C Images taken at (a) 254 nm; (b) 366 nm; (c) White light after derivatisation and (d) 366 nm after derivatisation with vanillin reagent; Track 1 – 4,5,7-trihydroxyflavanon, Track 2 – 0 h, Track 3 – 1 month, Track 4 – 2 month, Track 5 – 3 month, Track 6 – 4 month, and Track 7 – 5 month; 5  $\mu$ L of each honey extract respectively.

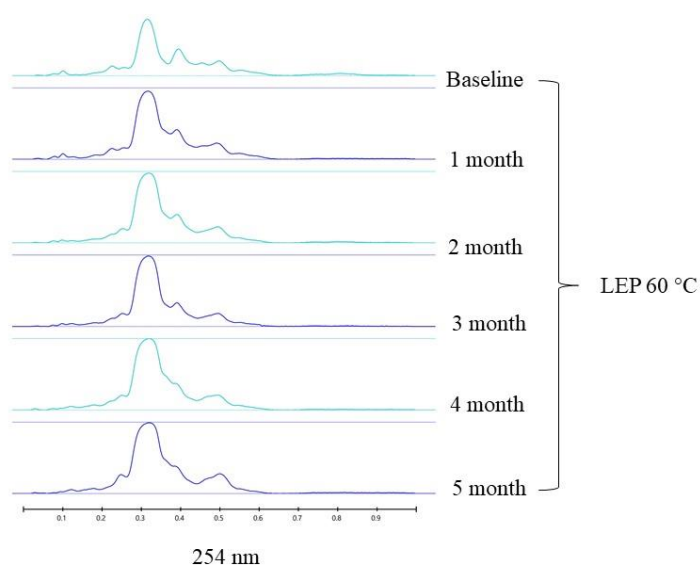

**Supplementary Figure S22.** Organic honey extract chromatograms (offset Y-axis values).

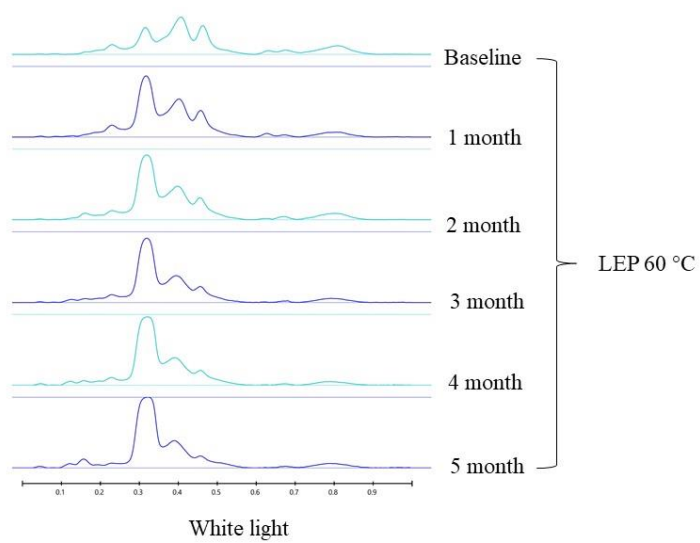

**Supplementary Figure S23.** Organic honey extract chromatograms (offset Y-axis values).

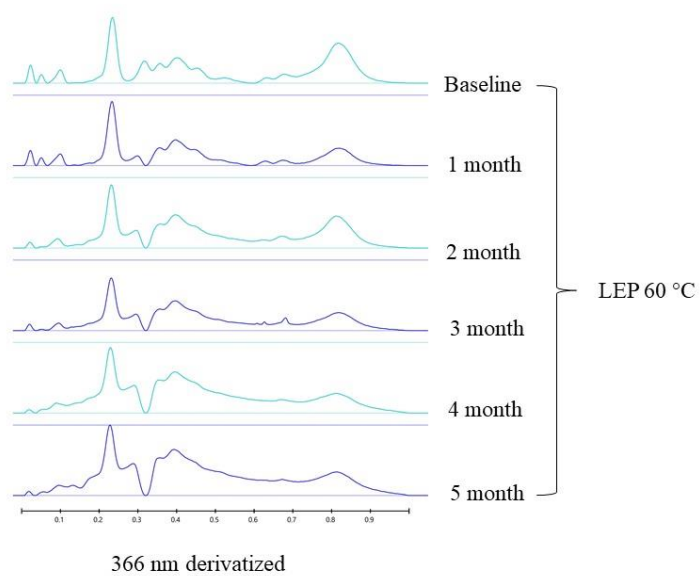

**Supplementary Figure S24.** Organic honey extract chromatograms (offset Y-axis values).

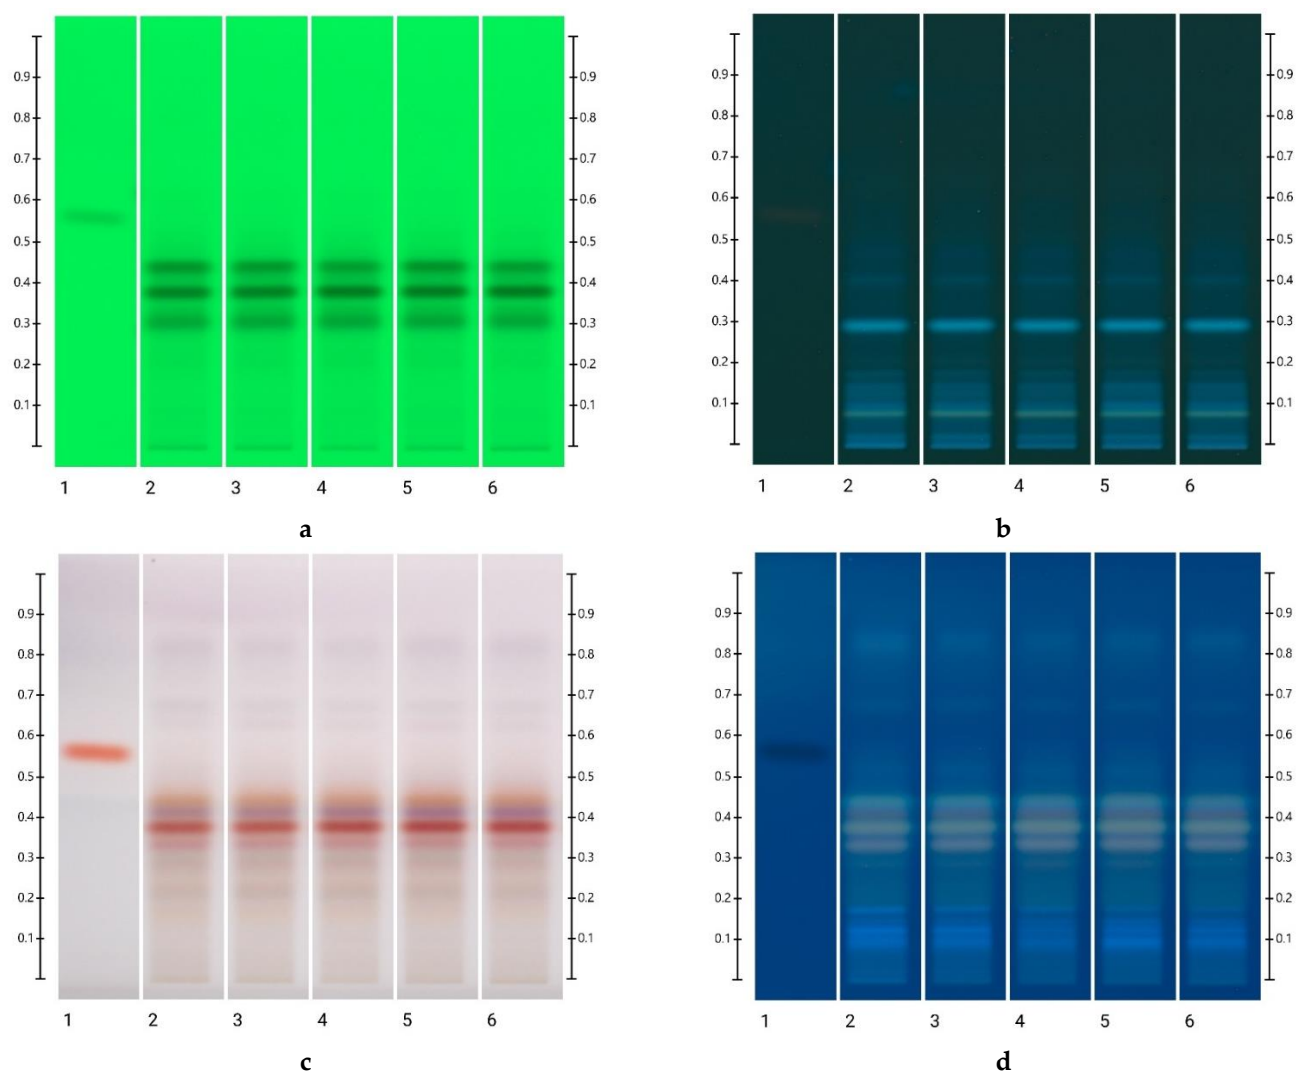

**Supplementary Figure S25.** MAR short-term storage at 40 °C; images taken at (a) 254 nm; (b) 366 nm; (c) White light after derivatisation and (d) 366 nm after derivatisation with vanillin reagent; Track 1 – 4,5,7-trihydroxyflavanon, Track 2 – 0 h, Track 3 – 6 h, Track 4 – 12 h, Track 5 – 24 h, and Track 6 – 48 h; 5  $\mu$ L of each honey extract respectively.

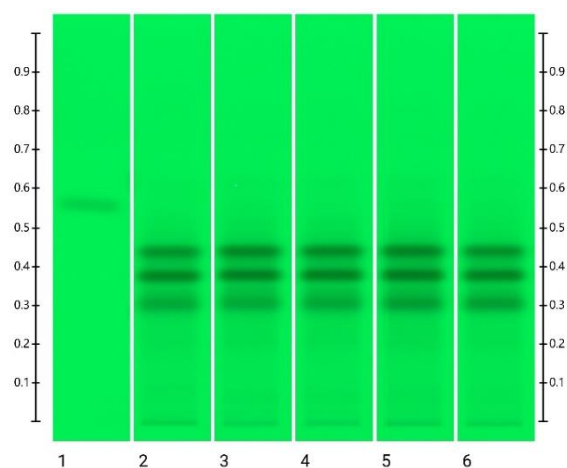

**a**

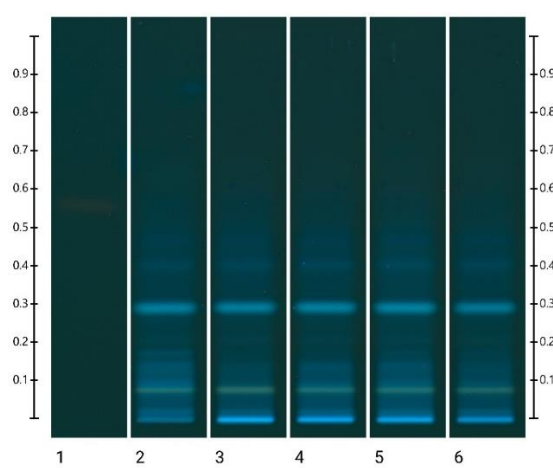

**b**

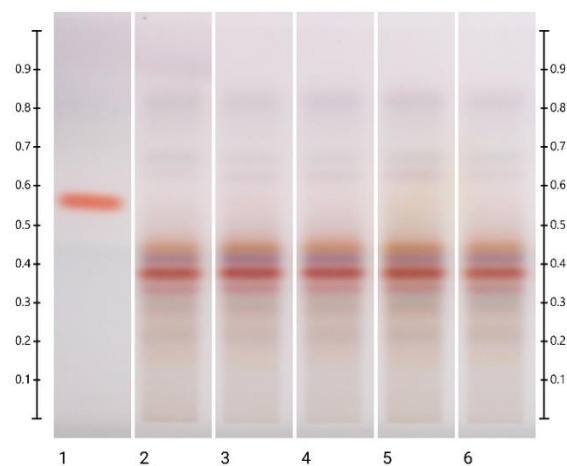

**c**

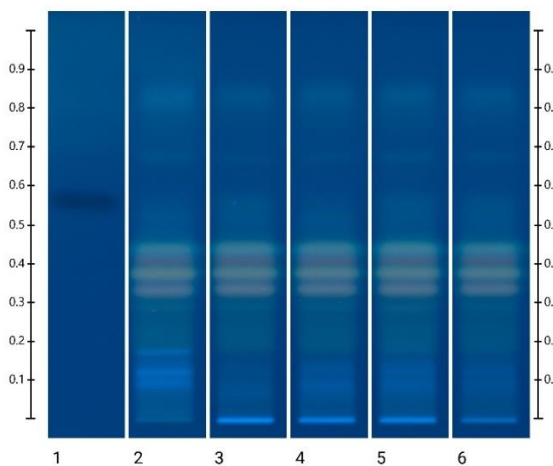

**d**

**Supplementary Figure S26.** MAR short-term storage at 60 °C; images taken at (a) 254 nm; (b) 366 nm; (c) White light after derivatisation and (d) 366 nm after derivatisation with vanillin reagent; Track 1 – 4,5,7-trihydroxyflavanon, Track 2— 0 h, Track 3— 6 h, Track 4— 12 h, Track 5— 24 h, and Track 6— 48 h; 5 µL of each honey extract respectively.

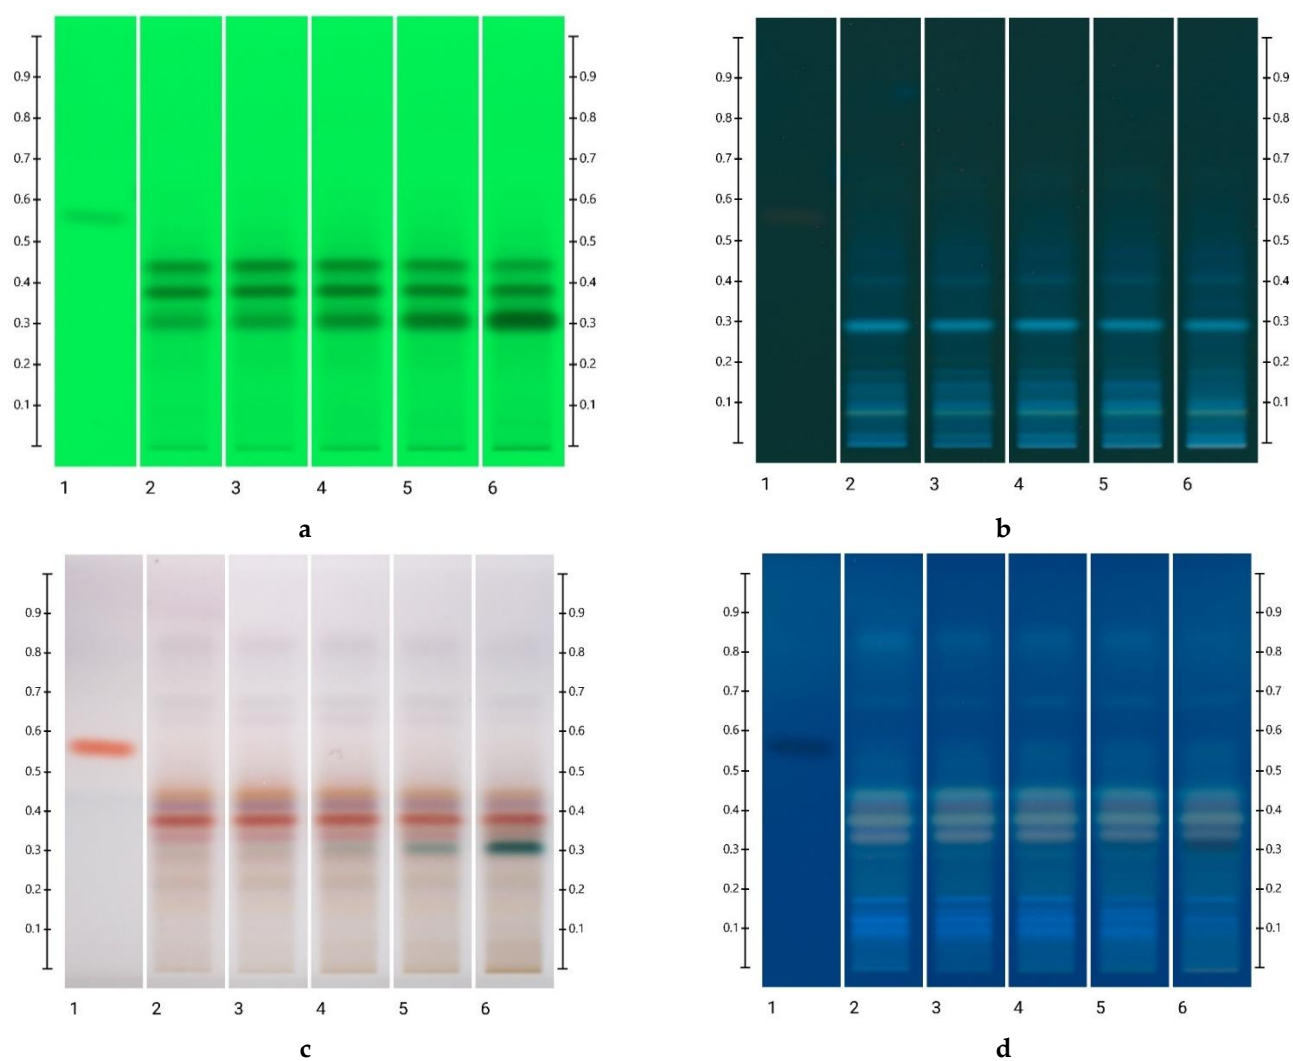

**Supplementary Figure S27.** MAR short-term storage at 80 °C; images taken at (a) 254 nm; (b) 366 nm; (c) White light after derivatisation and (d) 366 nm after derivatisation with vanillin reagent; Track 1 – 4,5,7-trihydroxyflavanon, Track 2 – 0 h, Track 3 – 6 h, Track 4 – 12 h, Track 5 – 24 h, and Track 6 – 48 h; 5  $\mu$ L of each honey extract respectively.

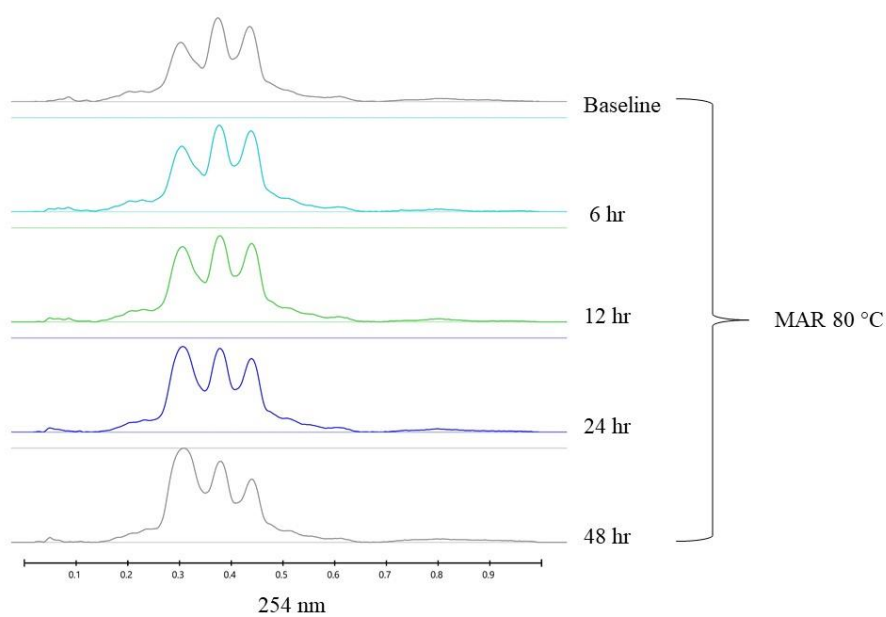

**Supplementary Figure S28.** Organic honey extract chromatograms (offset Y-axis values).

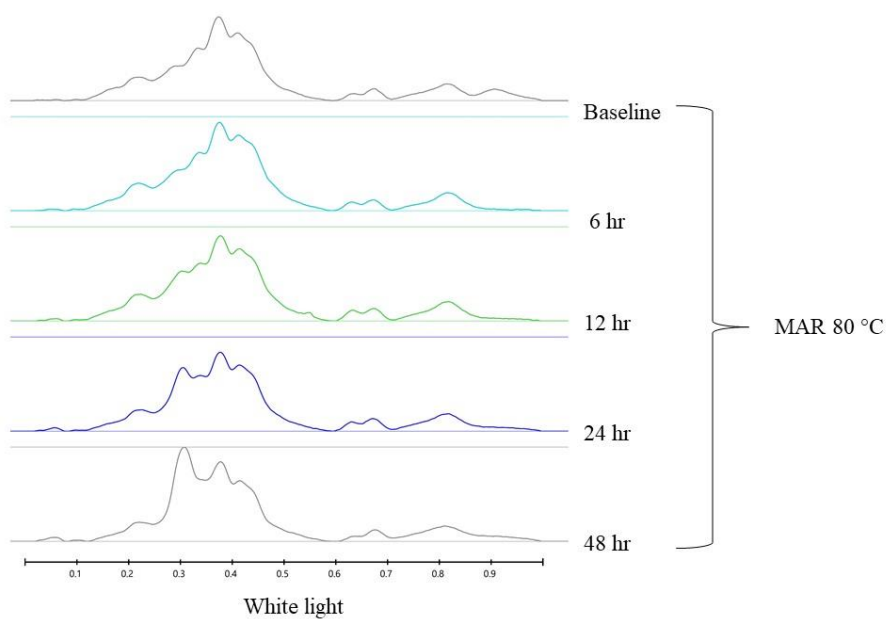

**Supplementary Figure S29.** Organic honey extract chromatograms (offset Y-axis values).

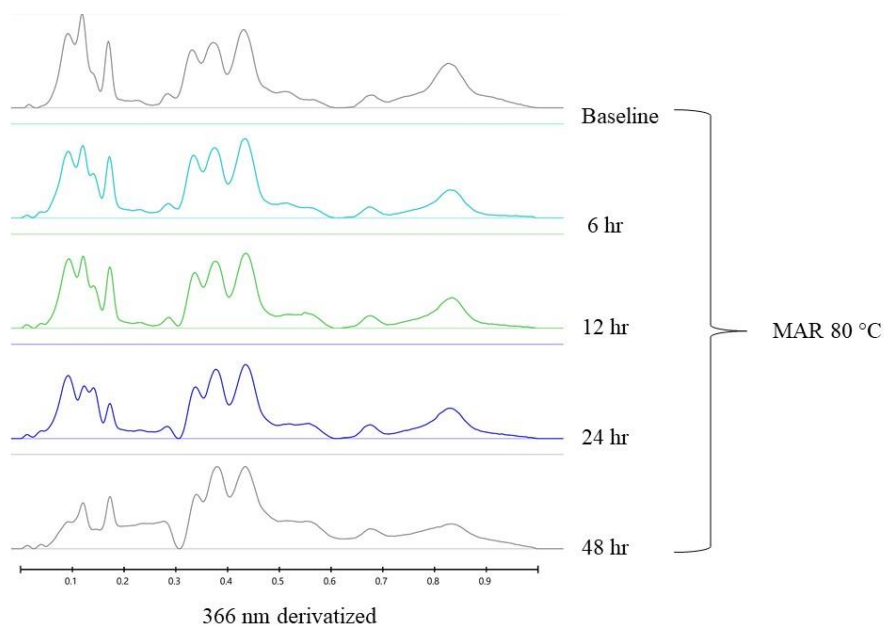

**Supplementary Figure S30.** Organic honey extract chromatograms (offset Y-axis values).



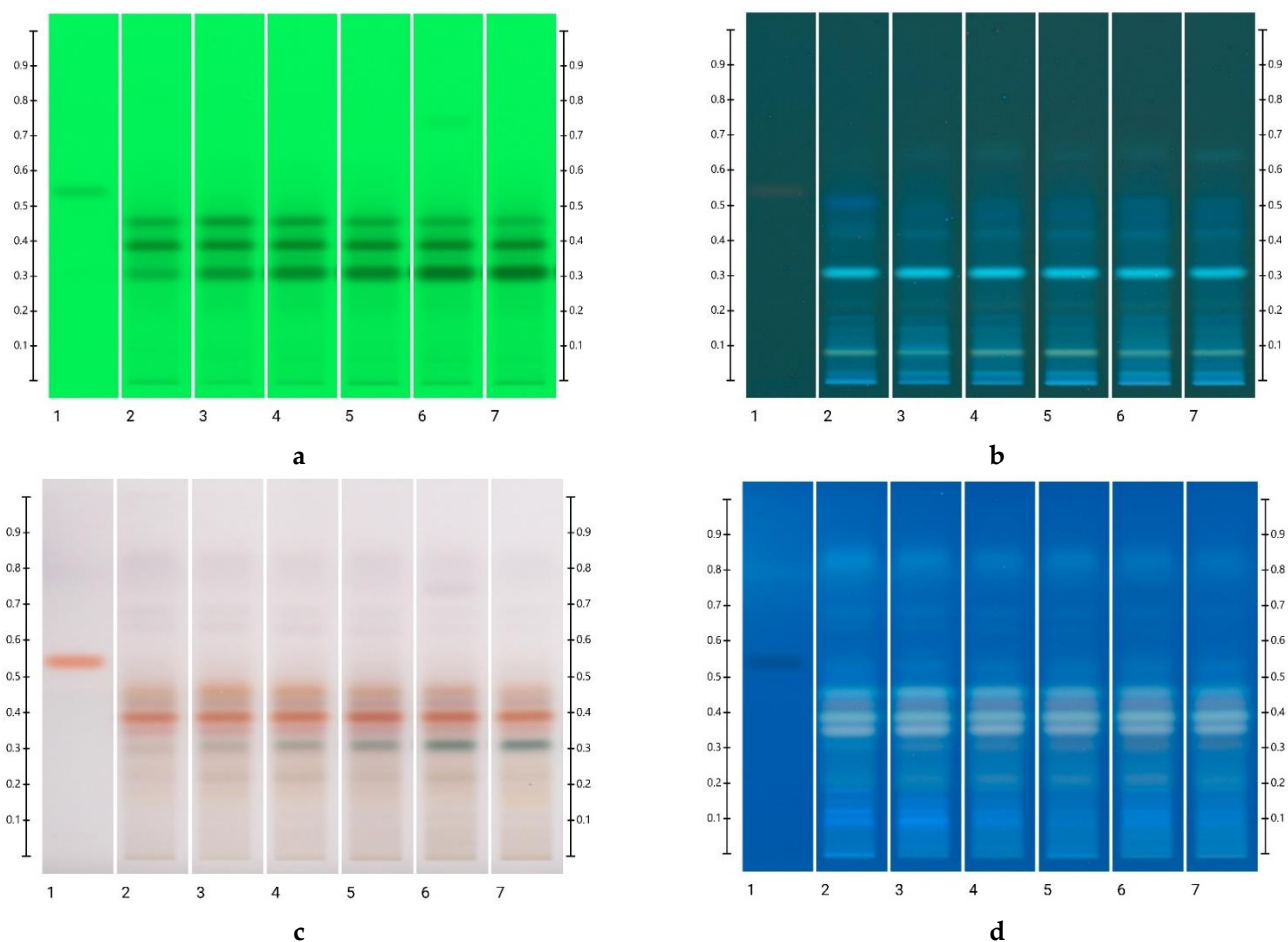

**Supplementary Figure S31.** MAR long-term storage at 40 °C Images taken at (a) 254 nm; (b) 366 nm; (c) White light after derivatisation and (d) 366 nm after derivatisation with vanillin reagent; Track 1—4,5,7-trihydroxyflavanon, Track 2— 0 h, Track 3— 1 month, Track 4— 2 month, Track 5— 3 month, Track 6— 4 month, and Track 7— 5 month; 5  $\mu$ L of each honey extract respectively.

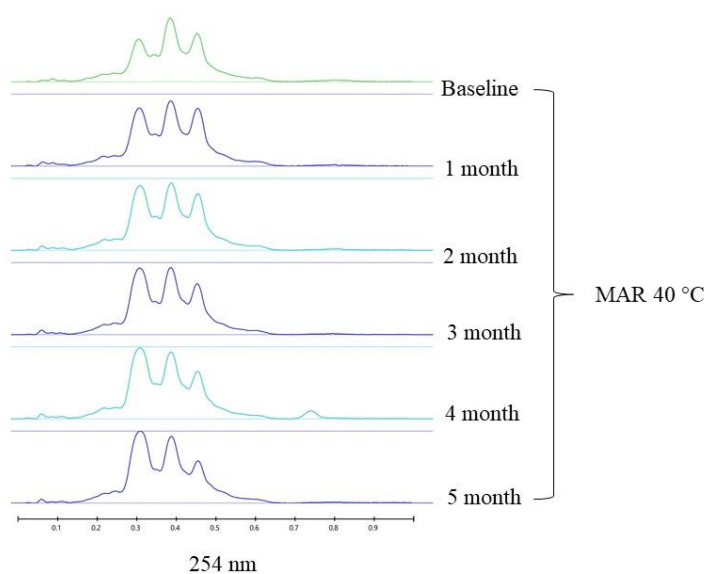

**Supplementary Figure S32.** Organic honey extract chromatograms (offset Y-axis values).

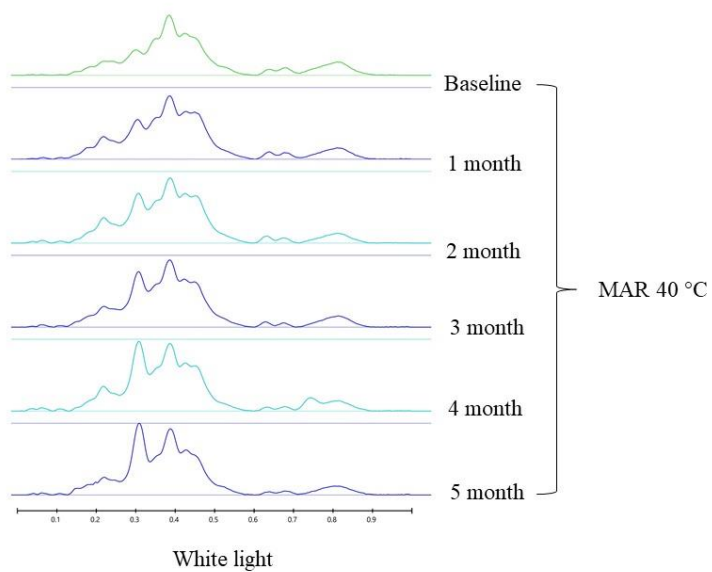

**Supplementary Figure S33.** Organic honey extract chromatograms (offset Y-axis values).

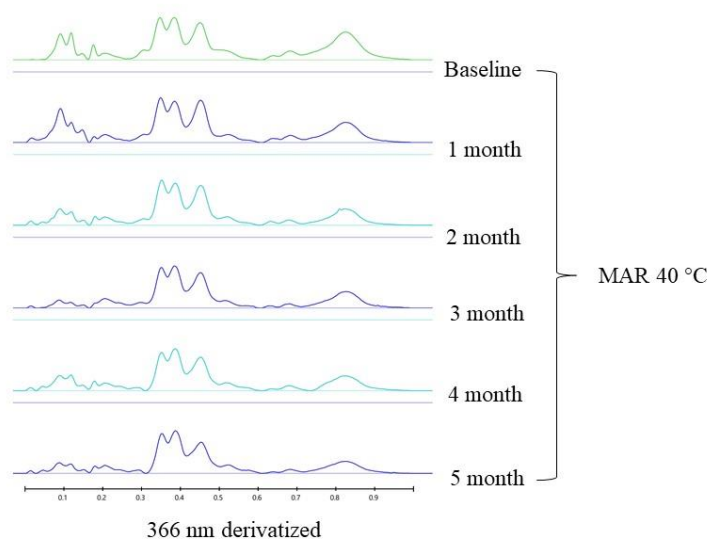

**Supplementary Figure S34.** Organic honey extract chromatograms (offset Y-axis values).

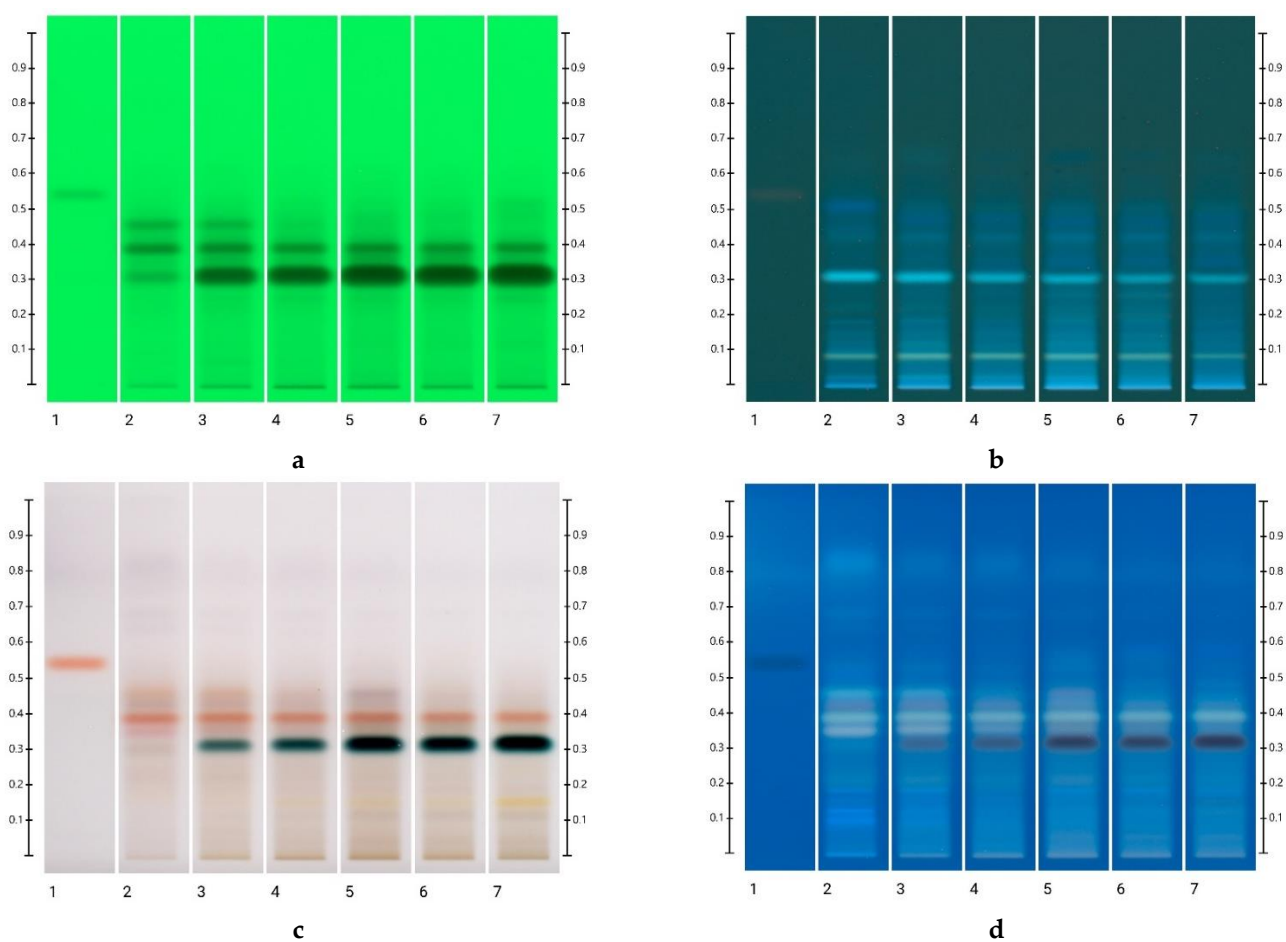

**Supplementary Figure S35.** MAR long-term storage at 60 °C Images taken at (a) 254 nm; (b) 366 nm; (c) White light after derivatisation and (d) 366 nm after derivatisation with vanillin reagent; Track 1—4,5,7-trihydroxyflavanon, Track 2— 0 h, Track 3— 1 month, Track 4— 2 month, Track 5— 3 month, Track 6— 4 month, and Track 7— 5 month; 5  $\mu$ L of each honey extract respectively.

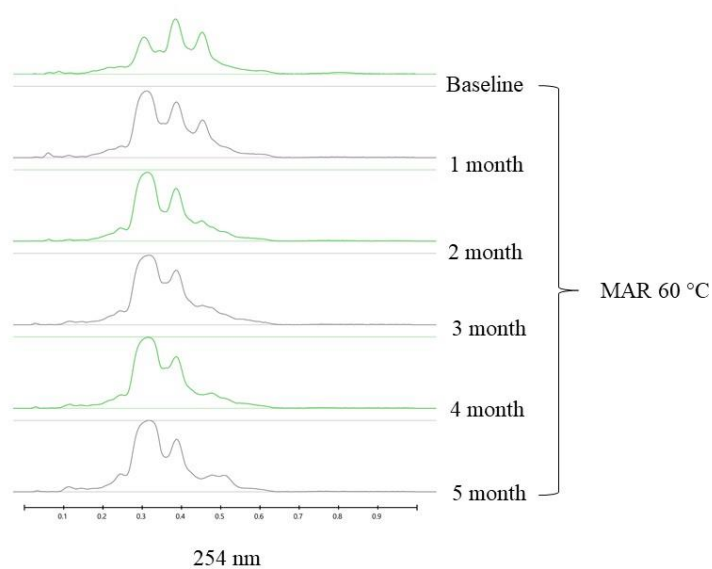

**Supplementary Figure S36.** Organic honey extract chromatograms (offset Y-axis values).

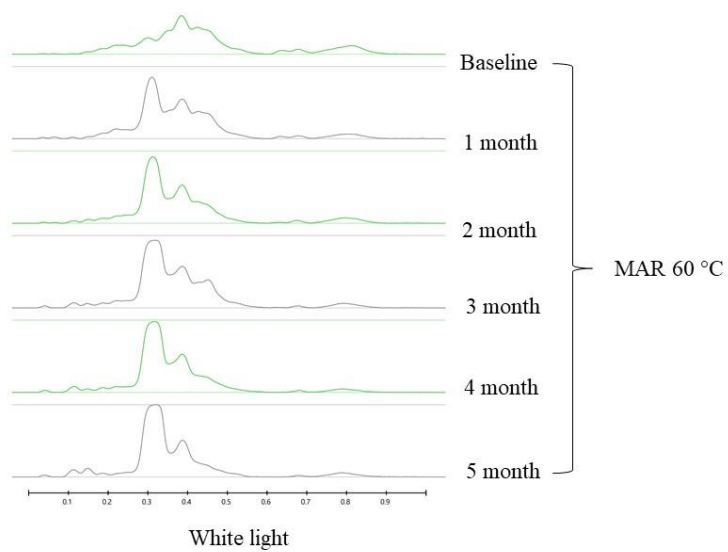

**Supplementary Figure S37.** Organic honey extract chromatograms (offset Y-axis values).

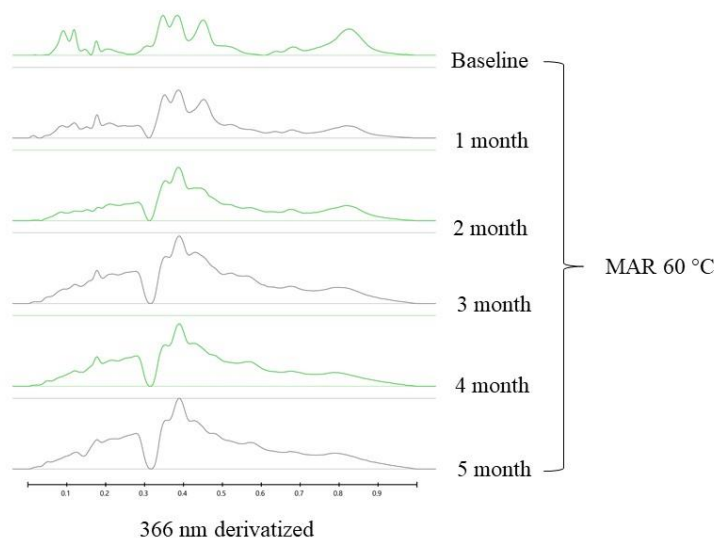

**Supplementary Figure S38.** Organic honey extract chromatograms (offset Y-axis values).

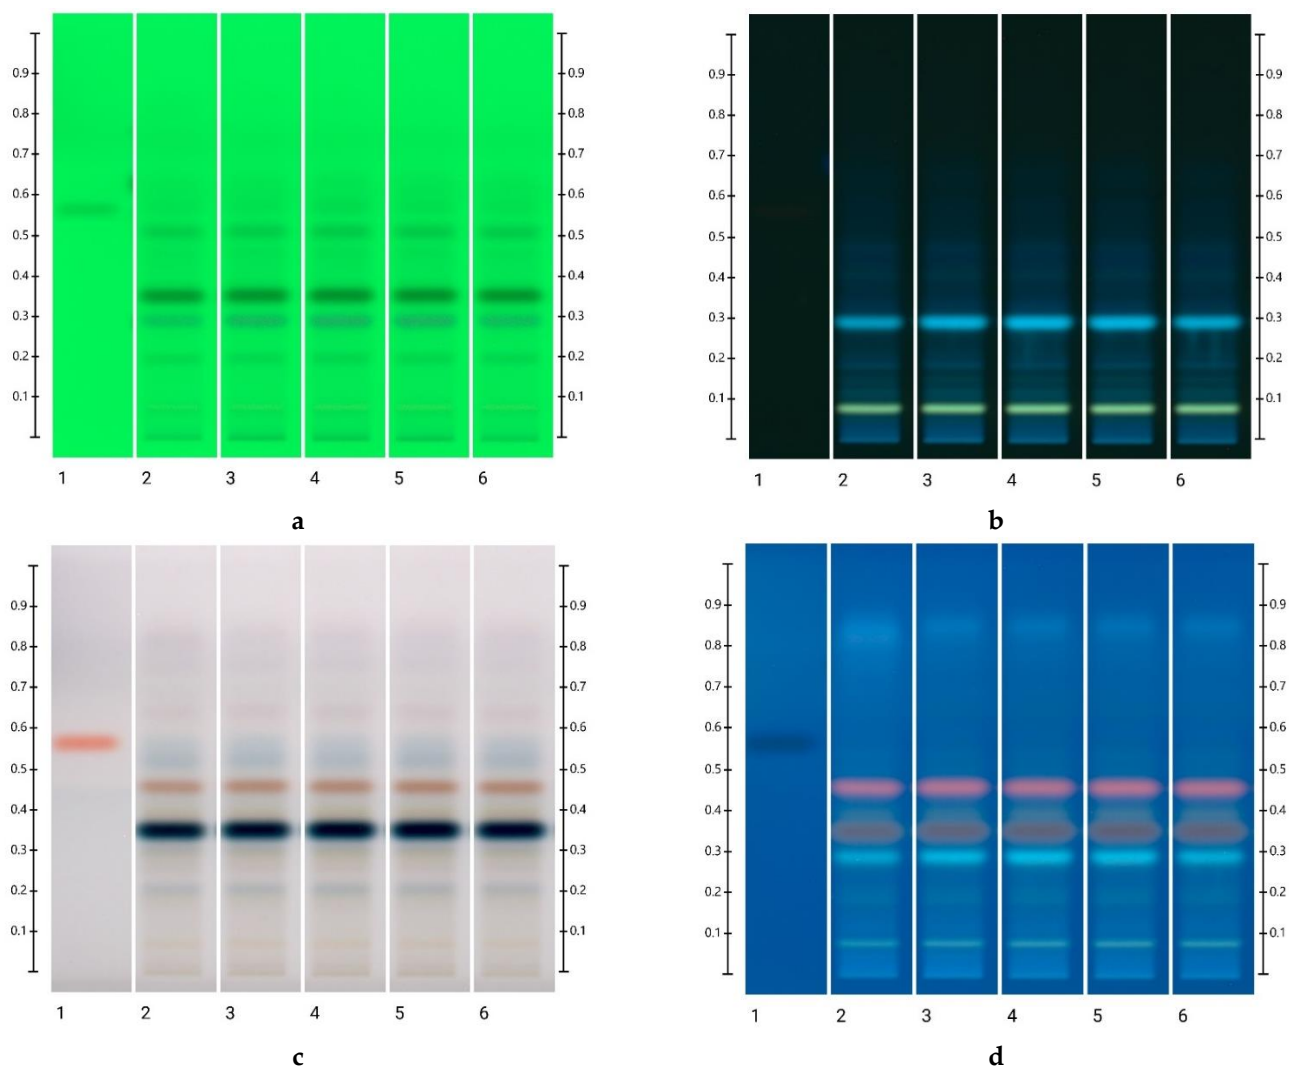

**Supplementary Figure S39.** PEP short-term storage at 40 °C; images taken at (a) 254 nm; (b) 366 nm; (c) White light after derivatisation and (d) 366 nm after derivatisation with vanillin reagent; Track 1 – 4,5,7-trihydroxyflavanon, Track 2– 0 h, Track 3– 6 h, Track 4– 12 h, Track 5– 24 h, and Track 6– 48 h; 5  $\mu$ L of each honey extract respectively.

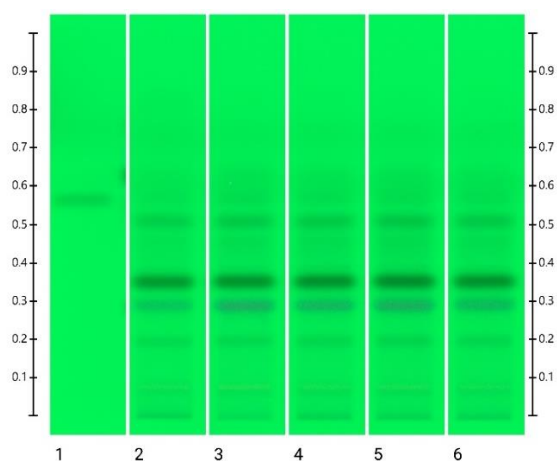

**a**

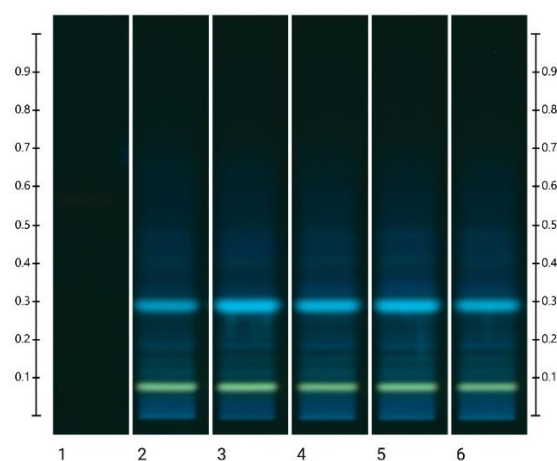

**b**

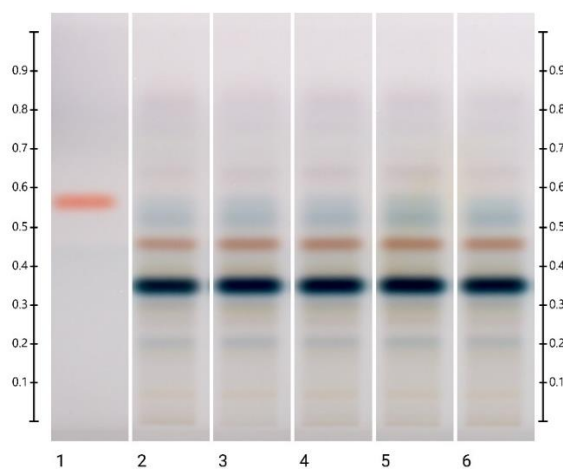

**c**

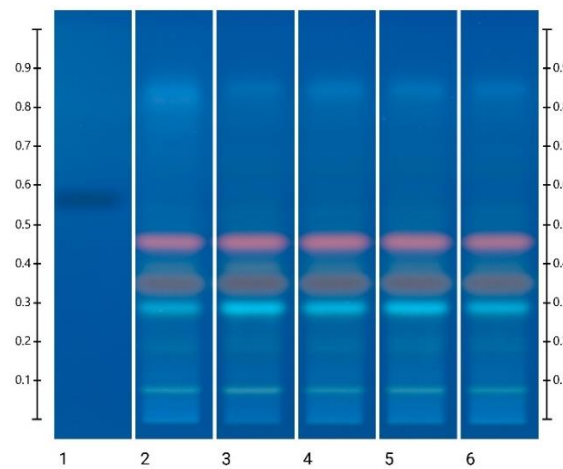

**d**

**Supplementary Figure S40.** PEP short-term storage at 60 °C; images taken at (a) 254 nm; (b) 366 nm; (c) White light after derivatisation and (d) 366 nm after derivatisation with vanillin reagent; Track 1 – 4,5,7-trihydroxyflavanone, Track 2 – 0 h, Track 3 – 6 h, Track 4 – 12 h, Track 5 – 24 h, and Track 6 – 48 h; 5  $\mu$ L of each honey extract respectively.

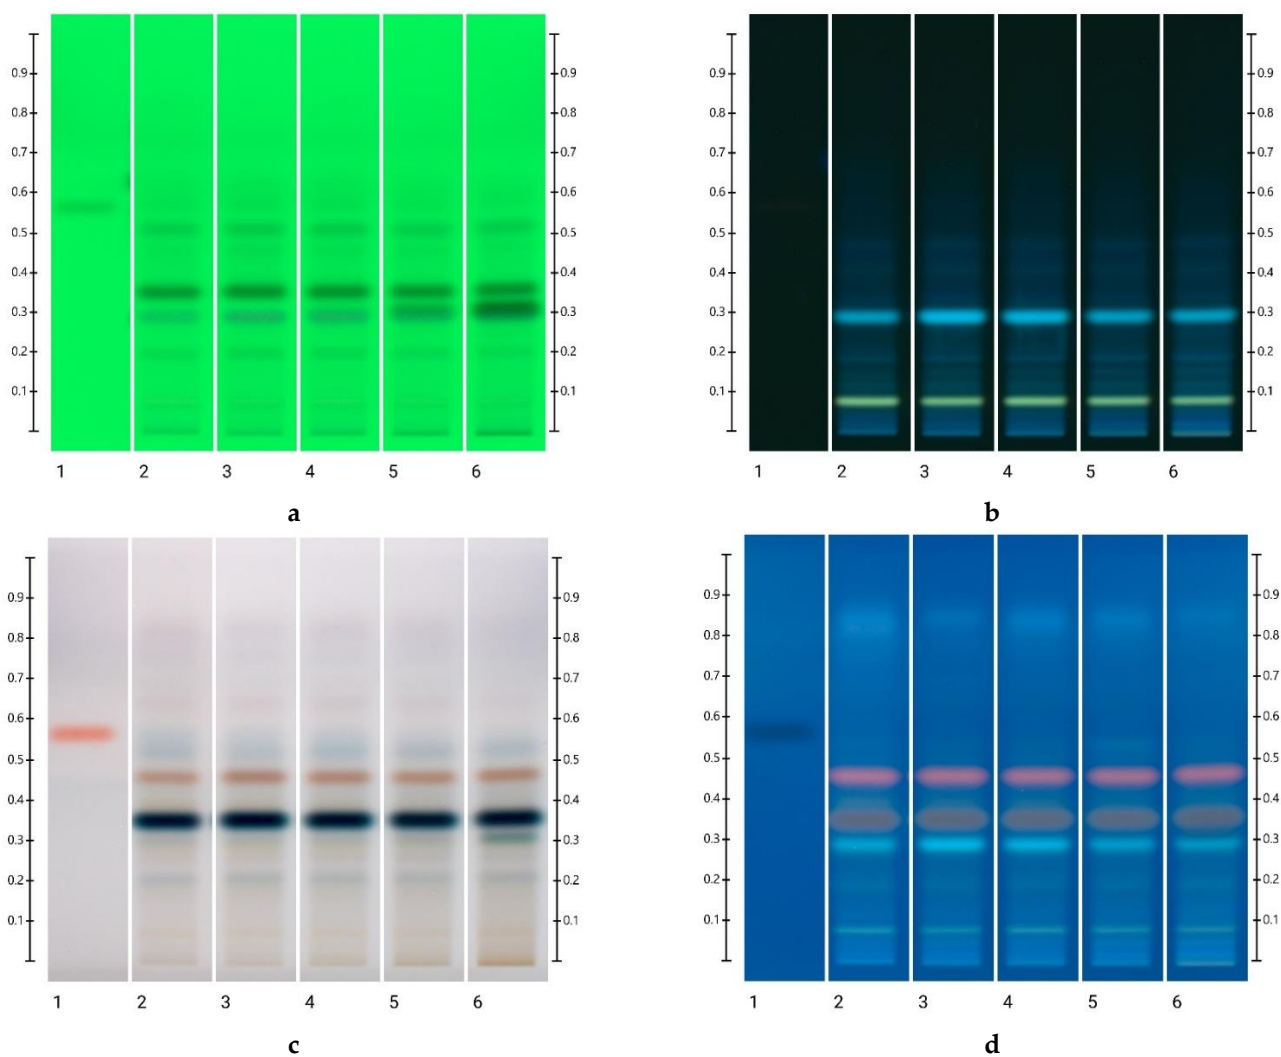

**Supplementary Figure S41.** PEP short-term storage at 80 °C; images taken at (a) 254 nm; (b) 366 nm; (c) White light after derivatisation and (d) 366 nm after derivatisation with vanillin reagent; Track 1 – 4,5,7-trihydroxyflavanon, Track 2 – 0 h, Track 3 – 6 h, Track 4 – 12 h, Track 5 – 24 h, and Track 6 – 48 h; 5  $\mu$ L of each honey extract respectively.

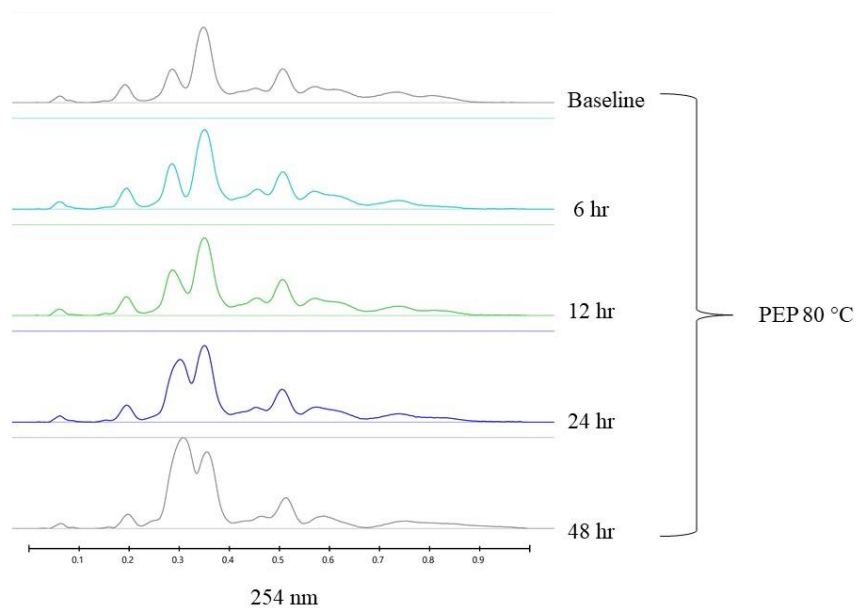

**Supplementary Figure S42.** Organic honey extract chromatograms (offset Y-axis values).

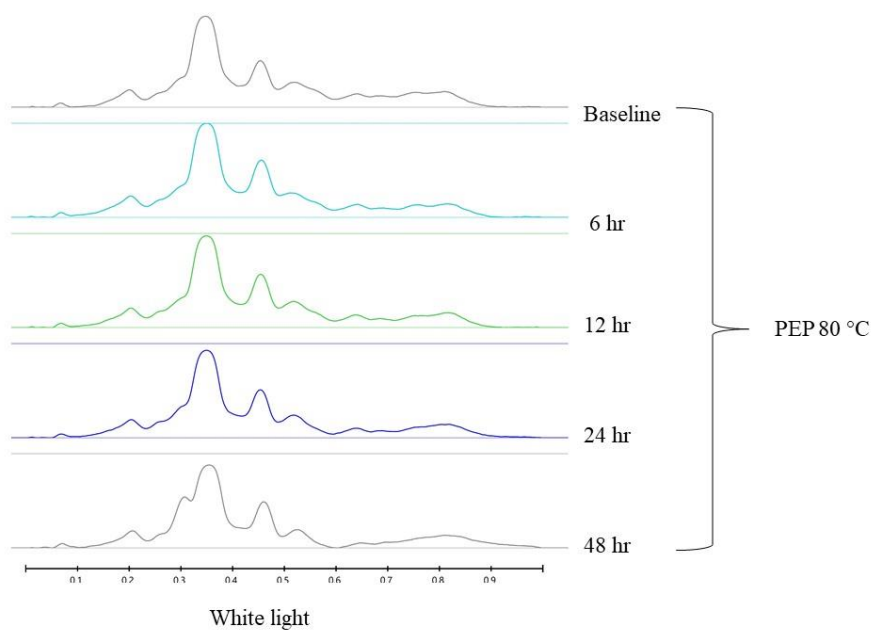

**Supplementary Figure S43.** Organic honey extract chromatograms (offset Y-axis values).



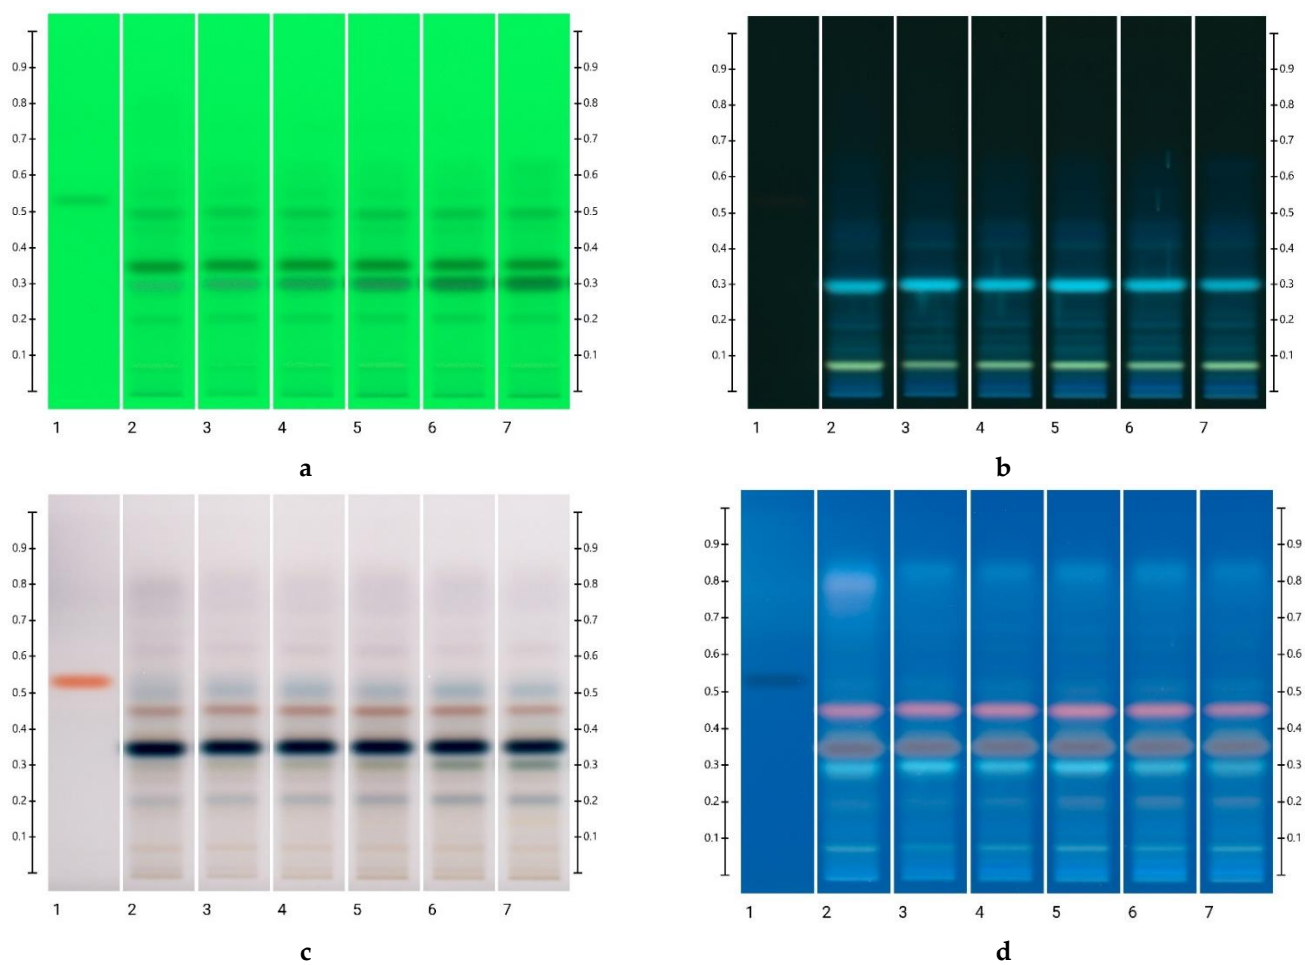

**Supplementary Figure S44.** PEP long-term storage at 40 °C Images taken at (a) 254 nm; (b) 366 nm; (c) White light after derivatisation and (d) 366 nm after derivatisation with vanillin reagent; Track 1 – 4,5,7-trihydroxyflavanon, Track 2 – 0 h, Track 3 – 1 month, Track 4 – 2 month, Track 5 – 3 month, Track 6 – 4 month, and Track 7 – 5 month; 5  $\mu$ L of each honey extract respectively.

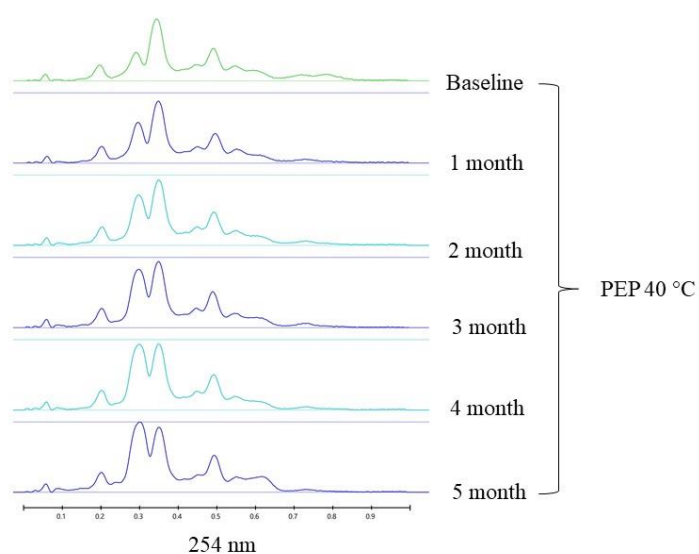

**Supplementary Figure S45.** Organic honey extract chromatograms (offset Y-axis values).

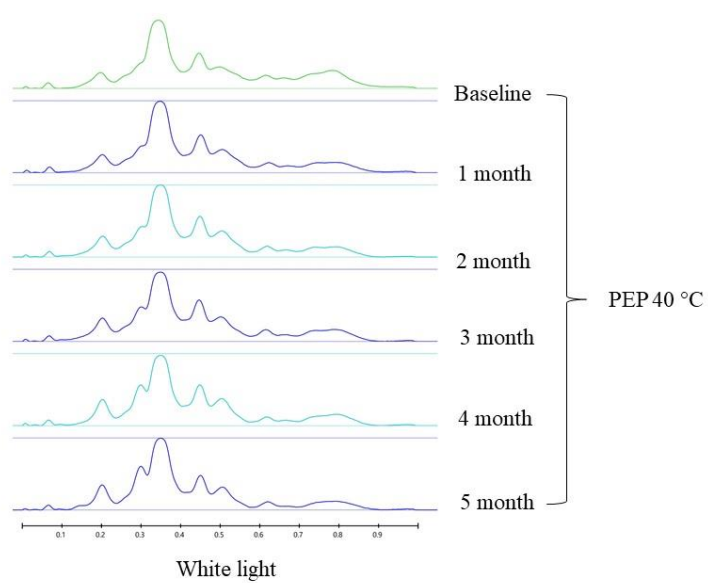

**Supplementary Figure S46.** Organic honey extract chromatograms (offset Y-axis values).

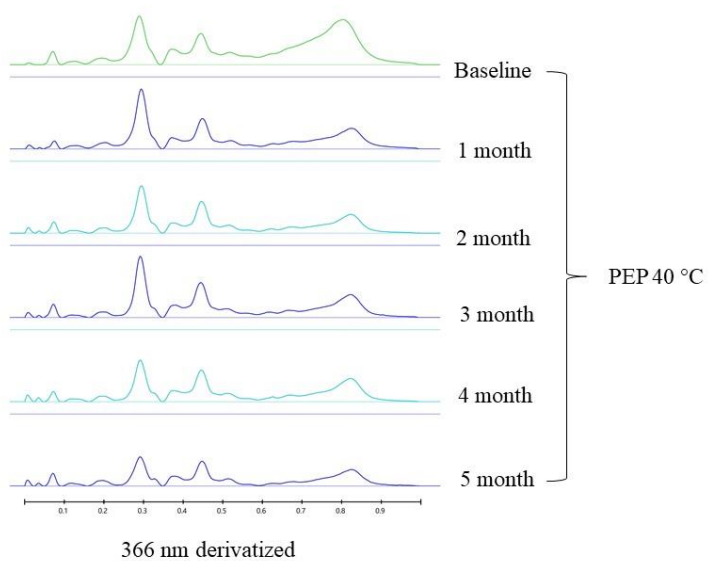

**Supplementary Figure S47.** Organic honey extract chromatograms (offset Y-axis values).

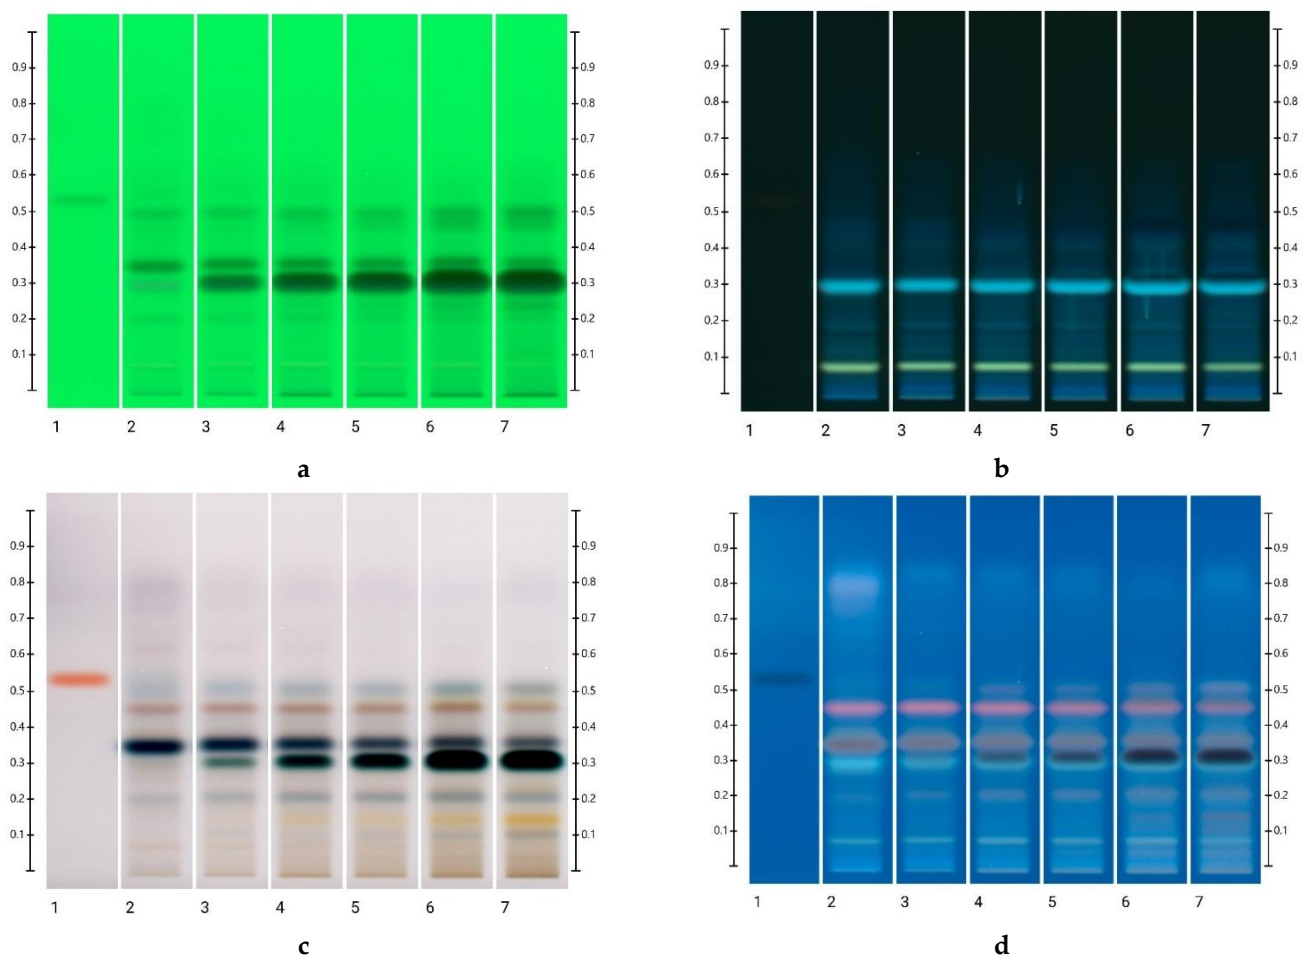

**Supplementary Figure S48.** PEP long-term storage at 60 °C Images taken at (a) 254 nm; (b) 366 nm; (c) White light after derivatisation and (d) 366 nm after derivatisation with vanillin reagent; Track 1 — 4,5,7-trihydroxyflavanon, Track 2 — 0 h, Track 3 — 1 month, Track 4 — 2 month, Track 5 — 3 month, Track 6 — 4 month, and Track 7 — 5 month; 5  $\mu$ L of each honey extract respectively.

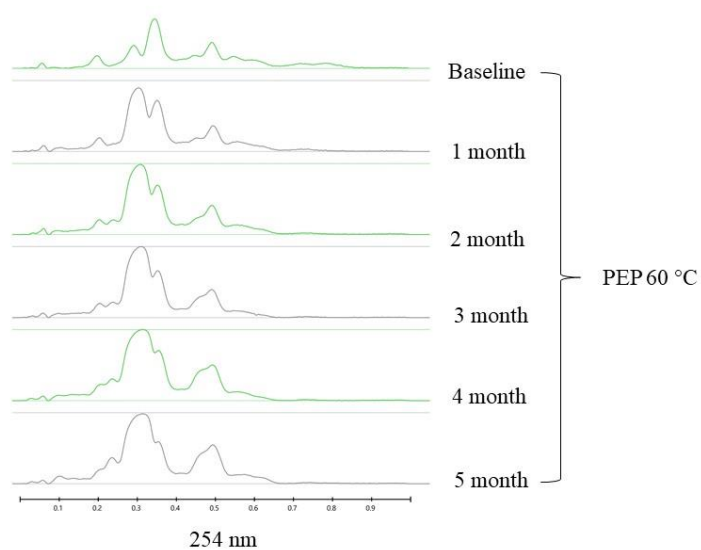

**Supplementary Figure S49.** Organic honey extract chromatograms (offset Y-axis values).

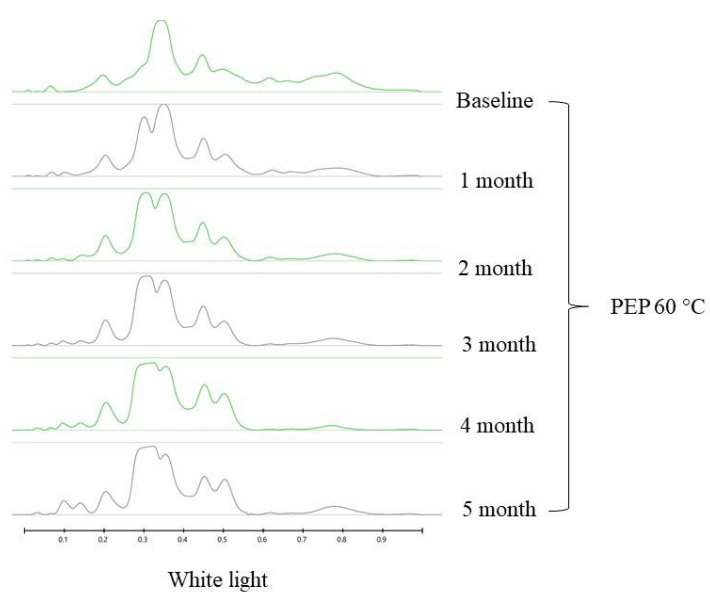

**Supplementary Figure S50.** Organic honey extract chromatograms (offset Y-axis values).

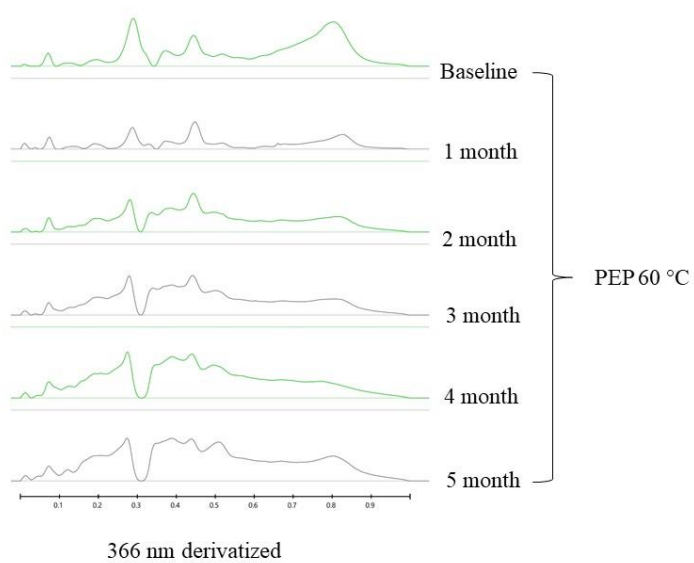

**Supplementary Figure S51.** Organic honey extract chromatograms (offset Y-axis values).

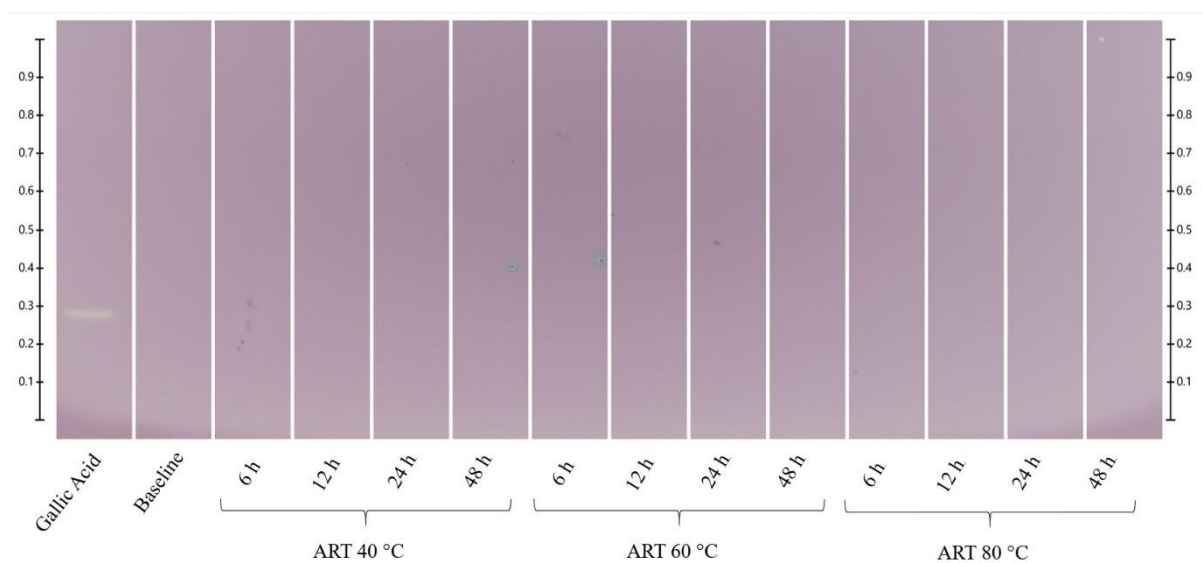

**Supplementary Figure S52.** HPTLC-DPPH fingerprints of ART stored at 40 °C, 60 °C and 80 °C for up to 48 h. Images of HPTLC plate were taken at White light after 60 min of derivatization with DPPH\* reagents; Gallic acid (4 µL) and honey extracts (5 µL) respectively.

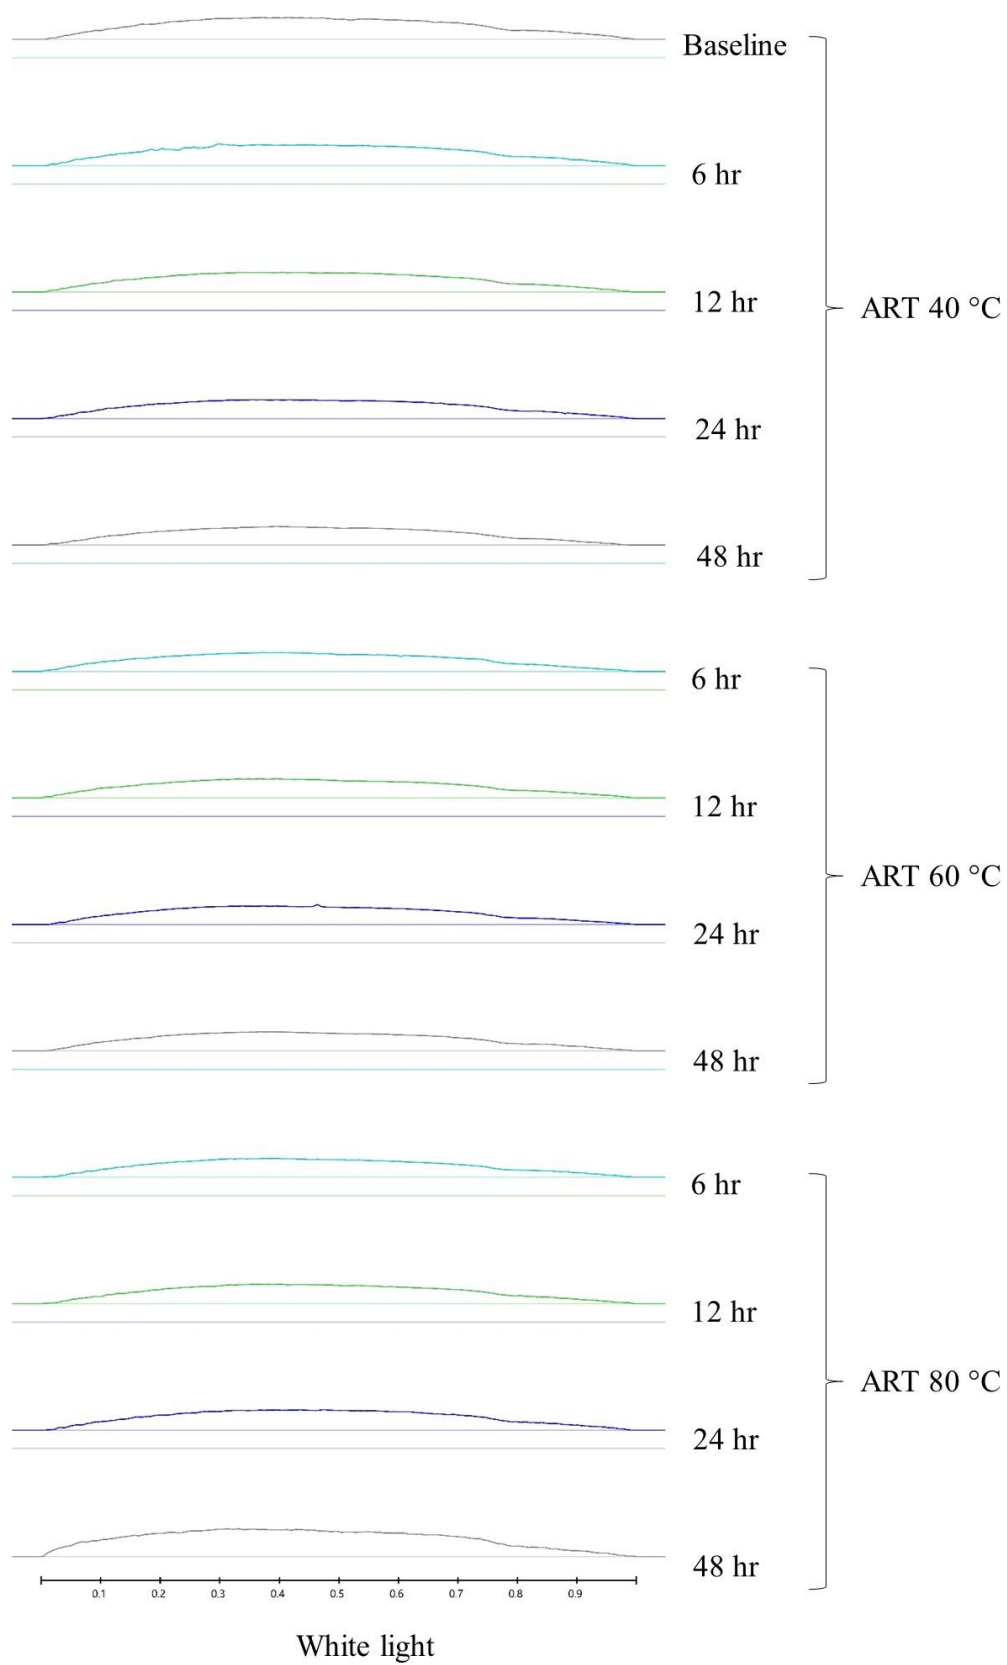

**Supplementary Figure S53.** Organic honey extract chromatograms (offset Y-axis values).

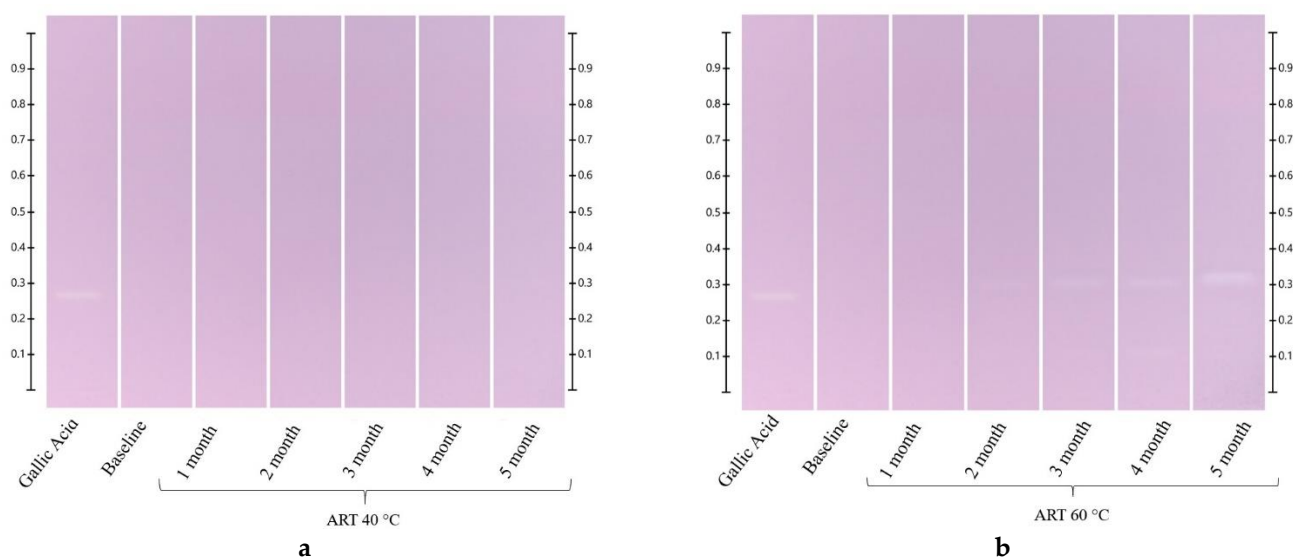

**Supplementary Figure S54.** HPTLC-DPPH fingerprints of ART stored at 40 °C (**a**), and at 60 °C (**b**) for up to 5 months. Images of HPTLC plate were taken at White light after 60 min of derivatization with DPPH\* reagents; Gallic acid (4  $\mu$ L) and honey extracts (5  $\mu$ L) respectively.

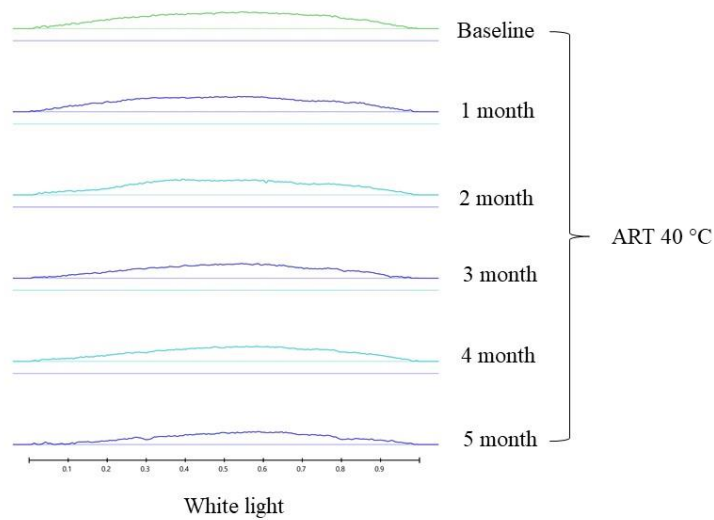

**Supplementary Figure S55.** Organic honey extract chromatograms (offset Y-axis values).

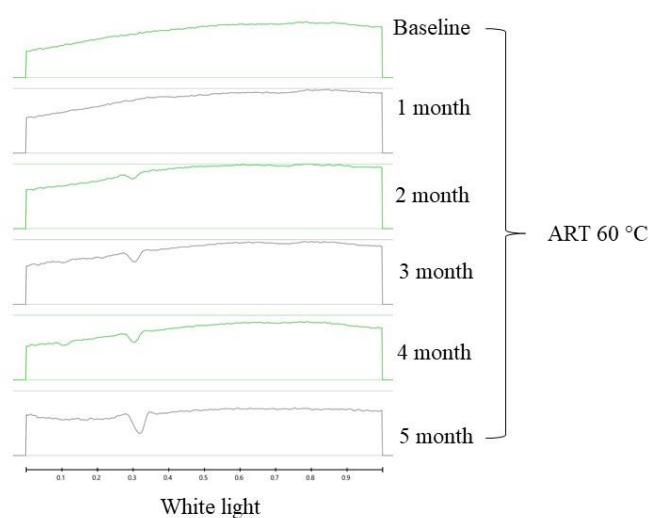

**Supplementary Figure S56.** Organic honey extract chromatograms (offset Y-axis values).

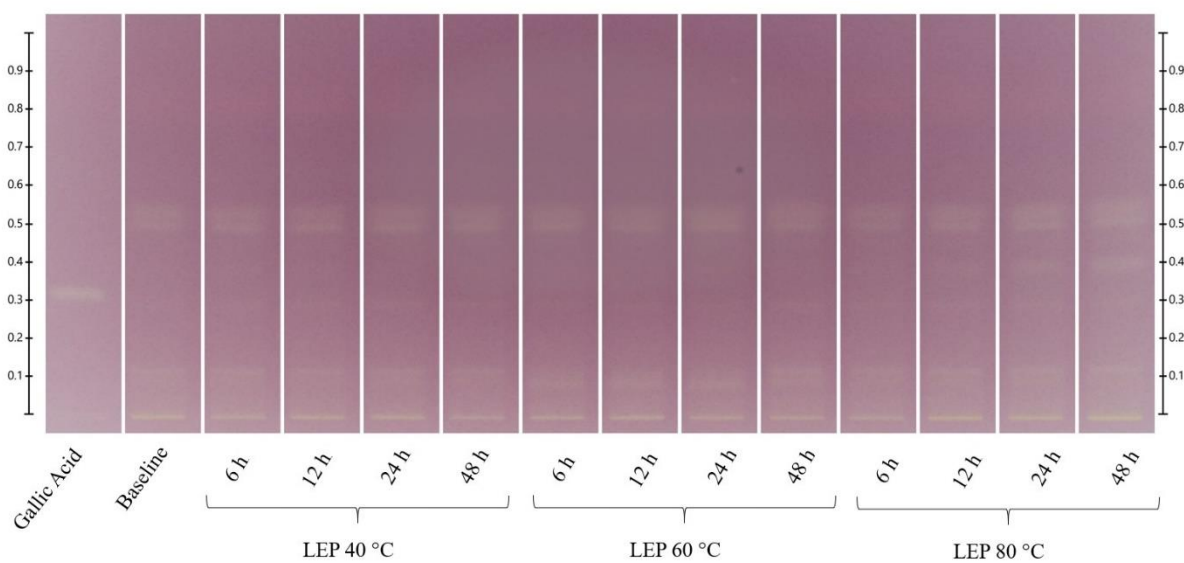

**Supplementary Figure S57.** HPTLC-DPPH fingerprints of LEP honey stored at 40 °C, 60 °C and 80 °C for up to 48 hours. Images of HPTLC plate were taken at White light after 60 min of derivatization with DPPH\* reagents; Gallic acid (4  $\mu$ L) and honey extracts (5  $\mu$ L) respectively.



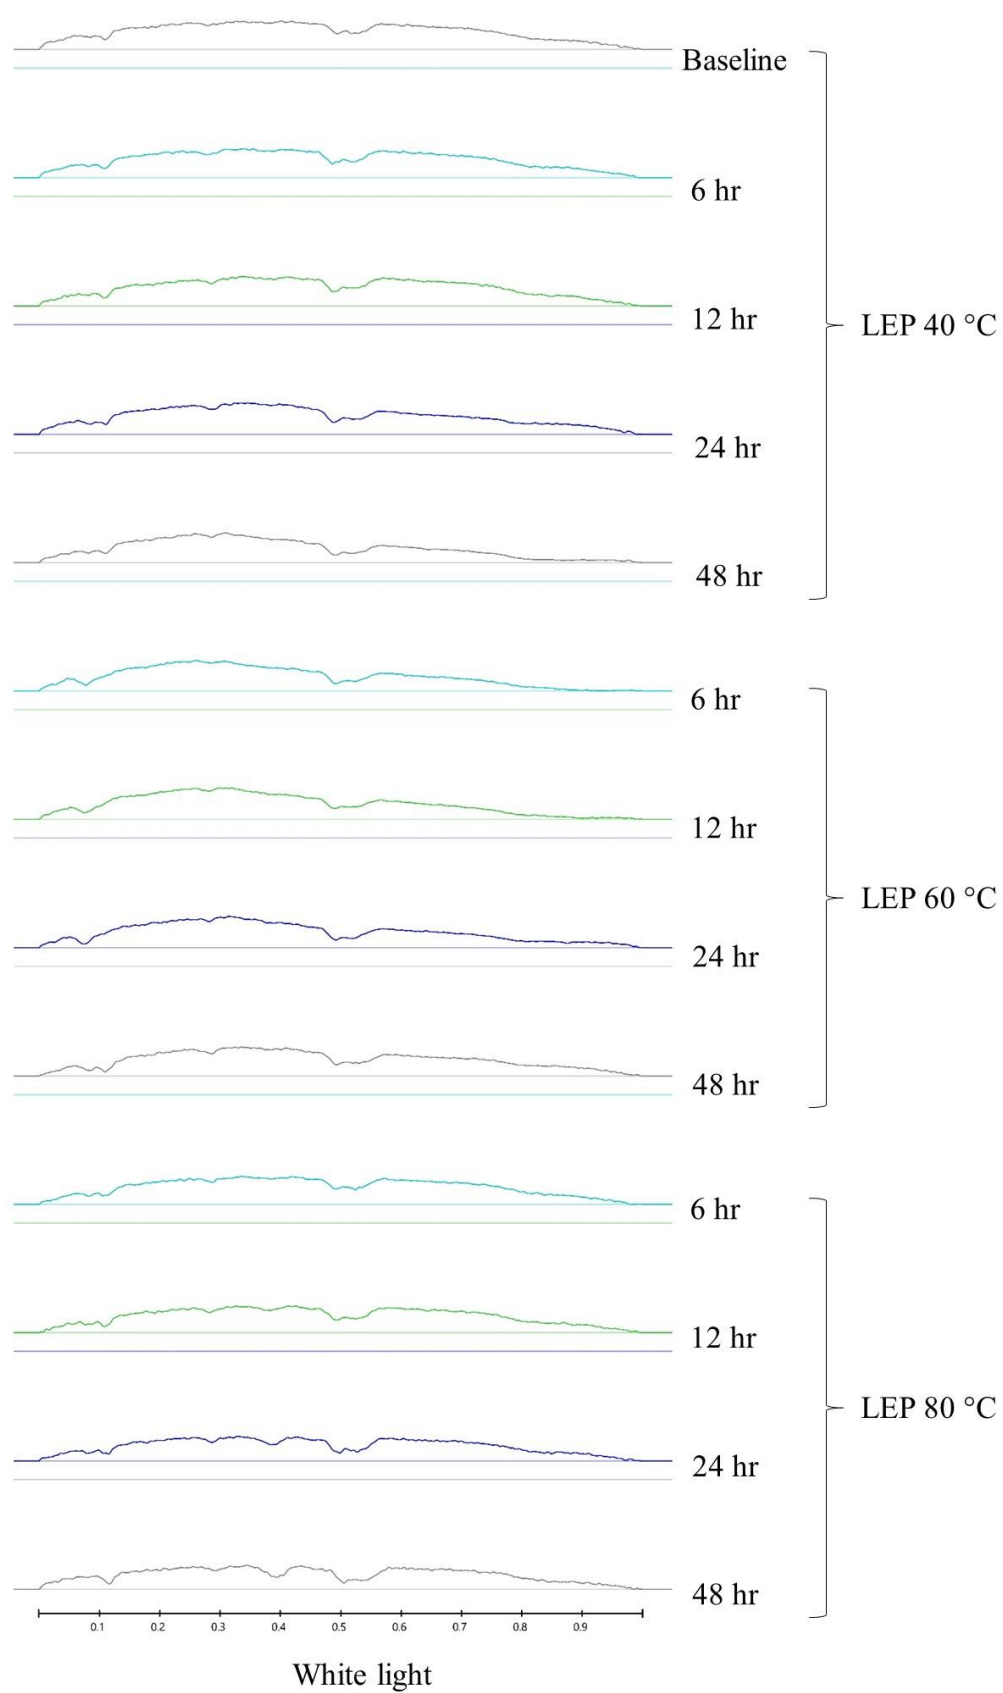

**Supplementary Figure S58.** Organic honey extract chromatograms (offset Y-axis values).

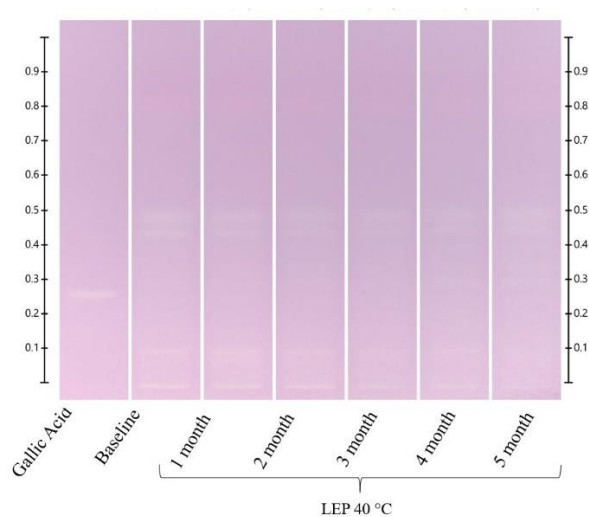

**a**

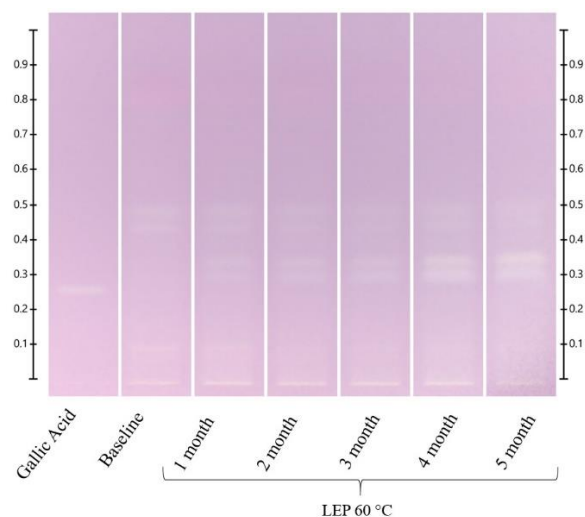

**b**

**Supplementary Figure S59.** HPTLC-DPPH fingerprints of LEP honey stored at 40 °C (**a**), and at 60 °C (**b**) for up to 5 months. Images of HPTLC plate were taken at White light after 60 min of derivatization with DPPH\* reagents; Gallic acid (4  $\mu$ L) and honey extracts (5  $\mu$ L) respectively.

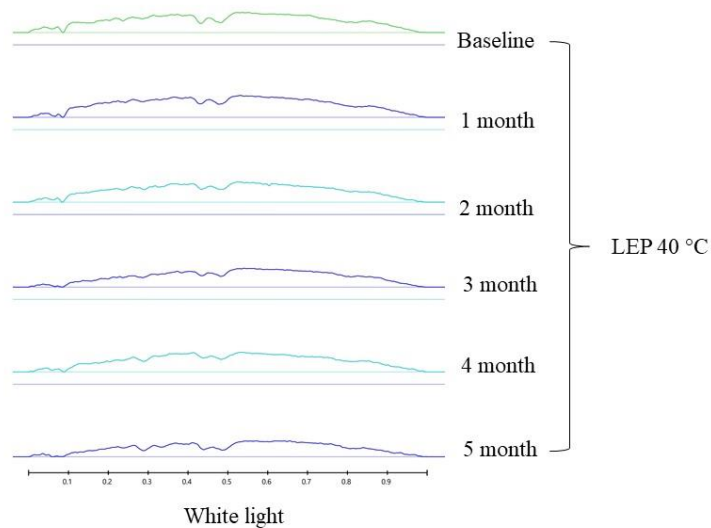

**Supplementary Figure S60.** Organic honey extract chromatograms (offset Y-axis values).

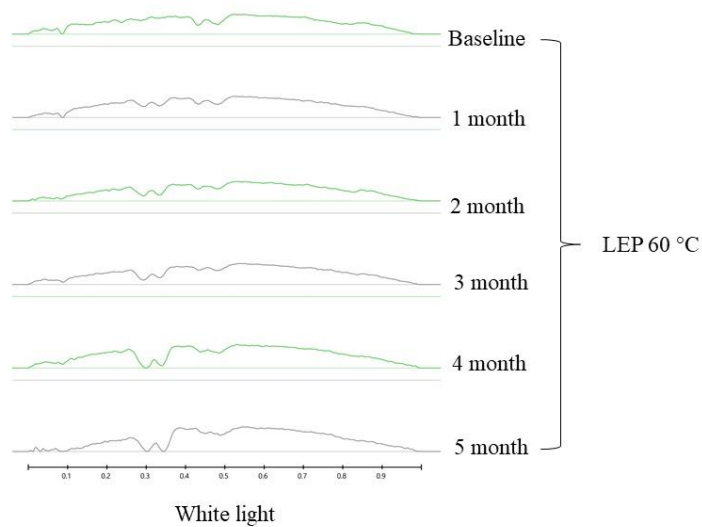

**Supplementary Figure S61.** Organic honey extract chromatograms (offset Y-axis values).

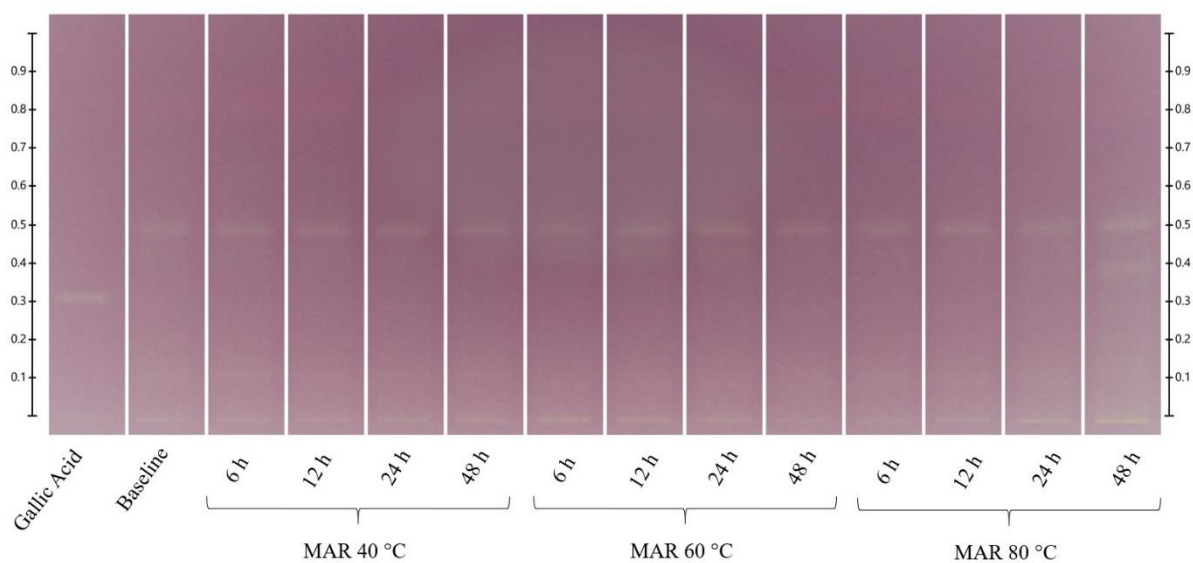

**Supplementary Figure S62.** HPTLC-DPPH fingerprints of MAR stored at 40 °C, 60 °C and 80 °C for up to 48 hours. Images of HPTLC plate were taken at White light after 60 min of derivatization with DPPH\* reagents; Gallic acid (4  $\mu$ L) and honey extracts (5  $\mu$ L) respectively.

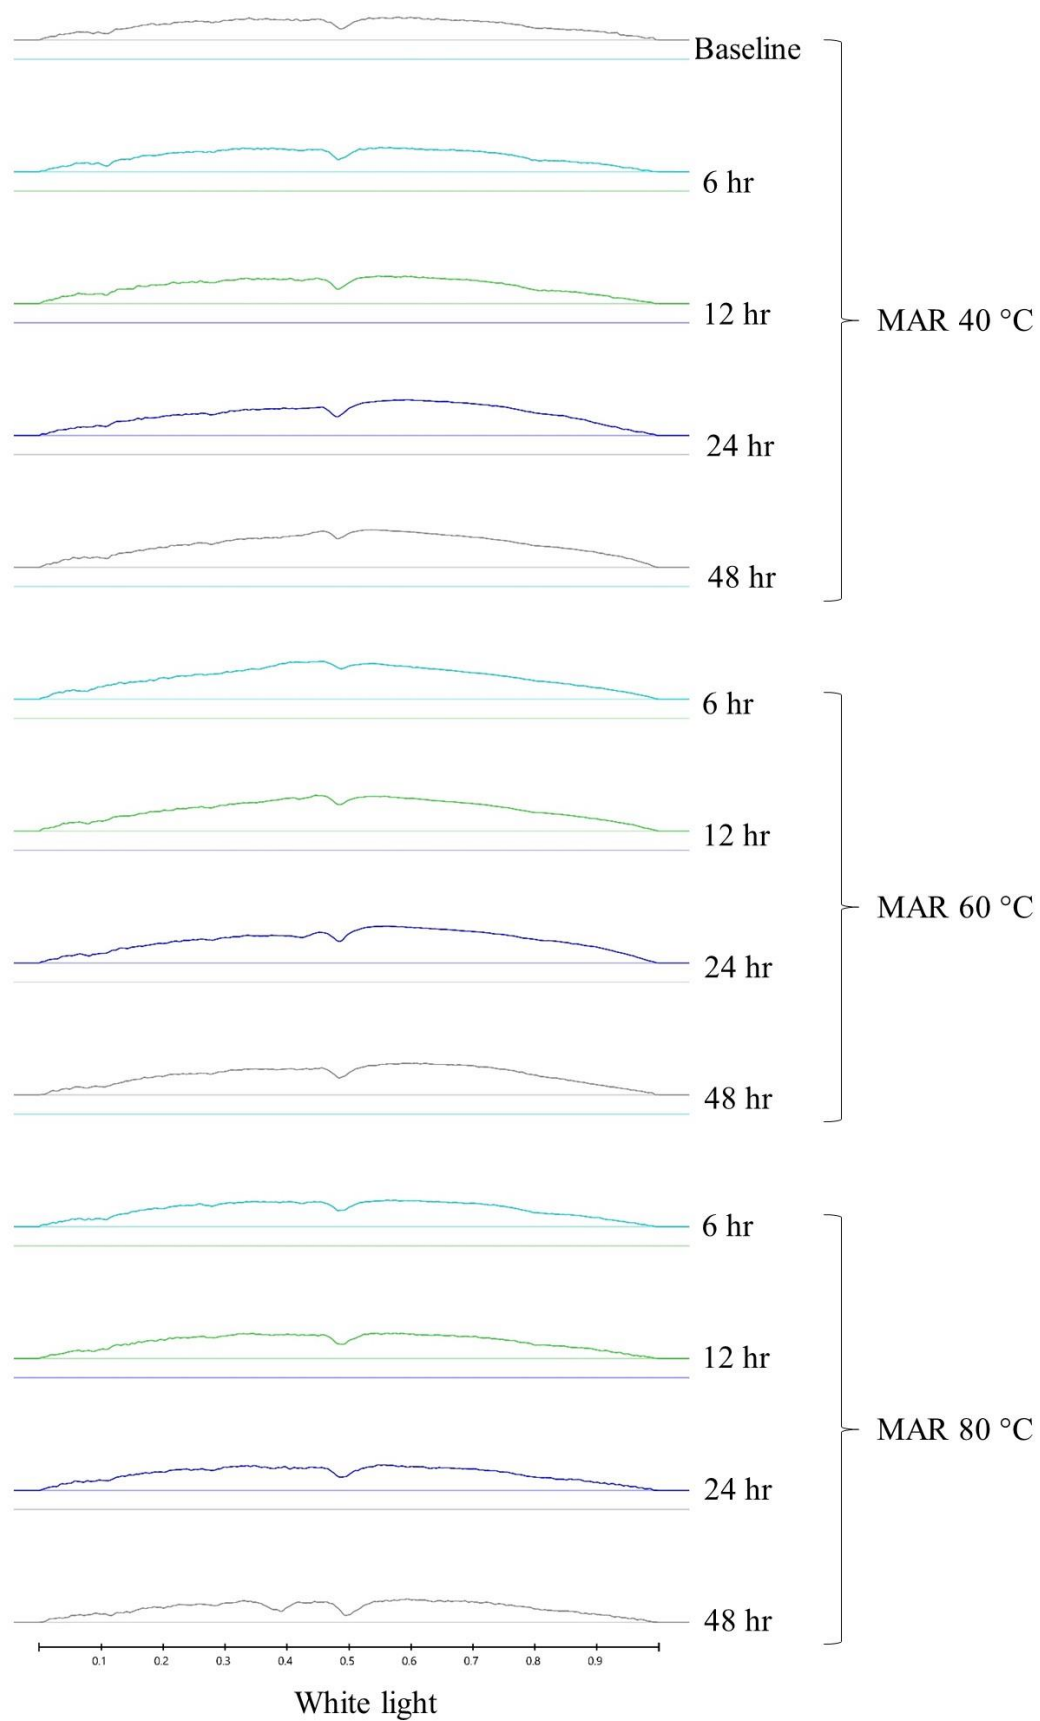

**Supplementary Figure S63.** Organic honey extract chromatograms (offset Y-axis values).

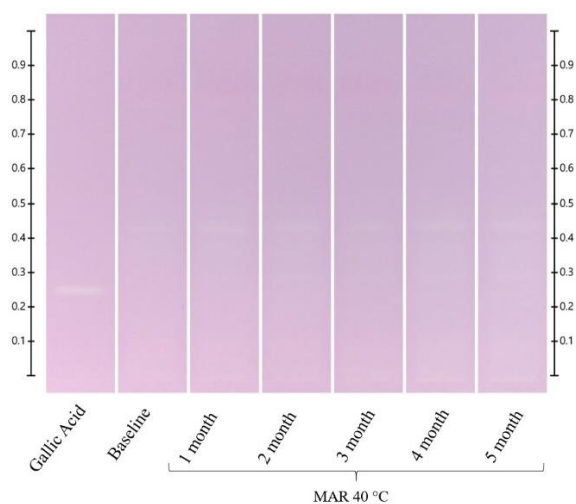

**a**

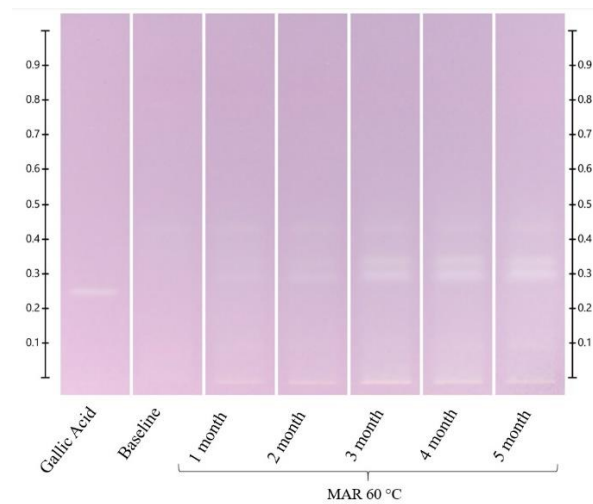

**b**

**Supplementary Figure S64.** HPTLC-DPPH fingerprints of MAR honey stored at 40 °C (**a**), and at 60 °C (**b**) for up to 5 months. Images of HPTLC plate were taken at White light after 60 min of derivatization with DPPH\* reagents; Gallic acid (4  $\mu$ L) and honey extracts (5  $\mu$ L) respectively.

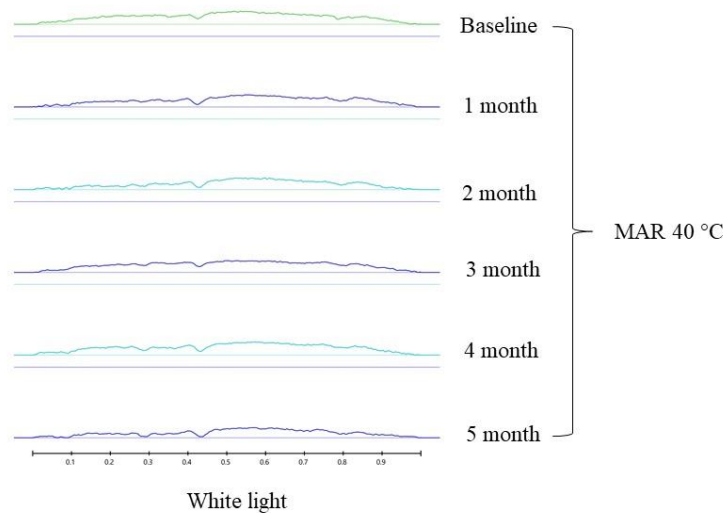

**Supplementary Figure S65.** Organic honey extract chromatograms (offset Y-axis values).

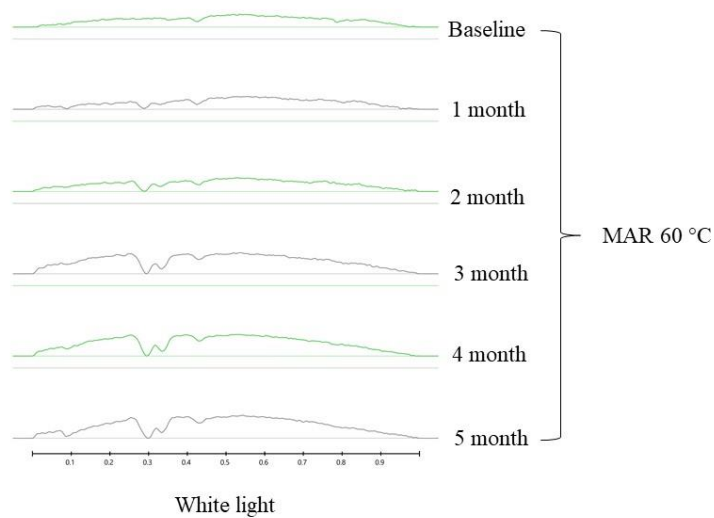

**Supplementary Figure S66.** Organic honey extract chromatograms (offset Y-axis values).

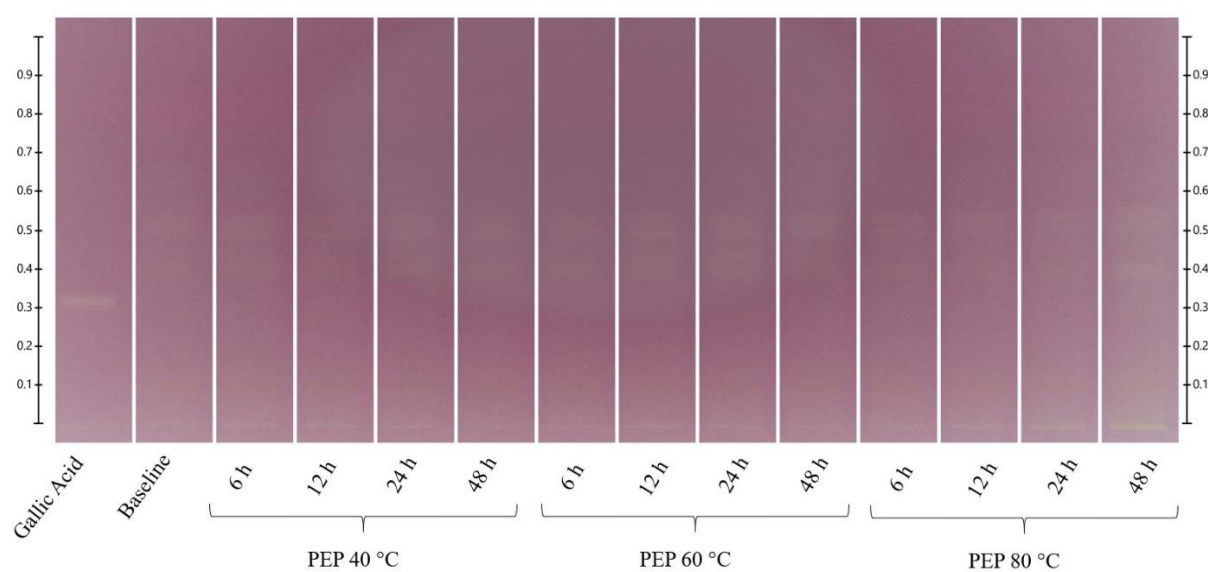

**Supplementary Figure S67.** HPTLC-DPPH fingerprints of PEP stored at 40 °C, 60 °C and 80 °C for up to 48 hours. Images of HPTLC plate were taken at White light after 60 min of derivatization with DPPH\* reagents; Gallic acid (4  $\mu$ L) and honey extracts (5  $\mu$ L) respectively.

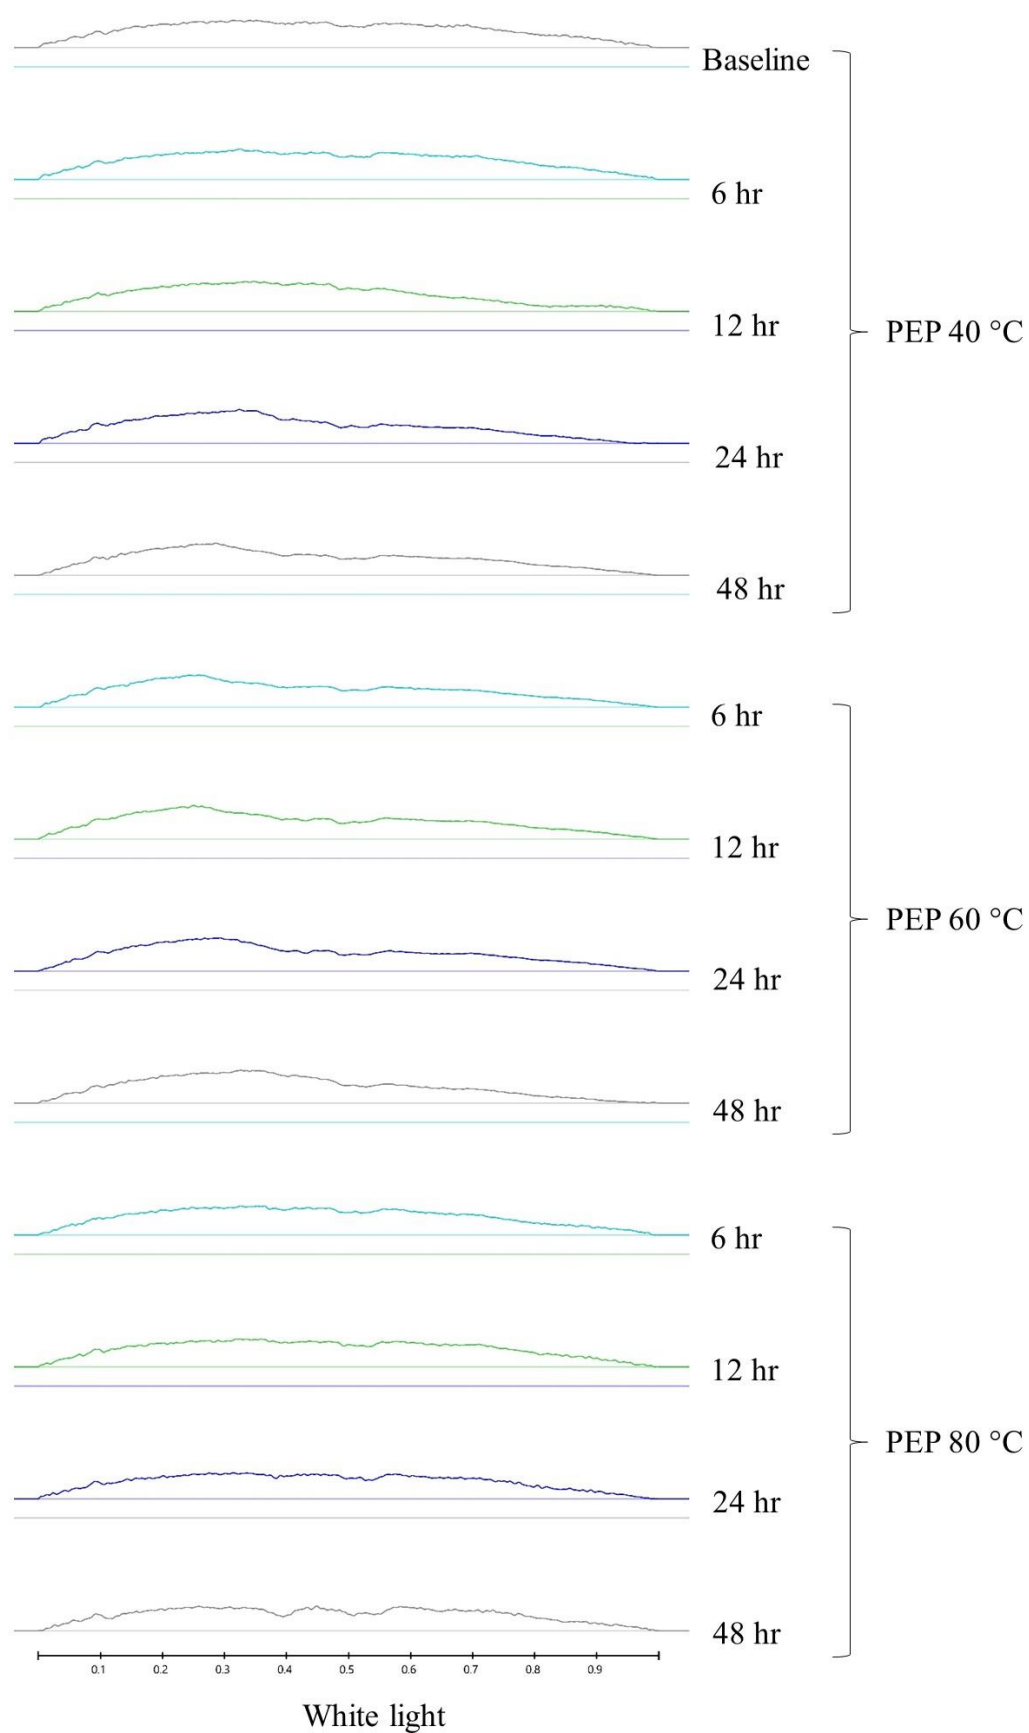

**Supplementary Figure S68.** Organic honey extract chromatograms (offset Y-axis values).

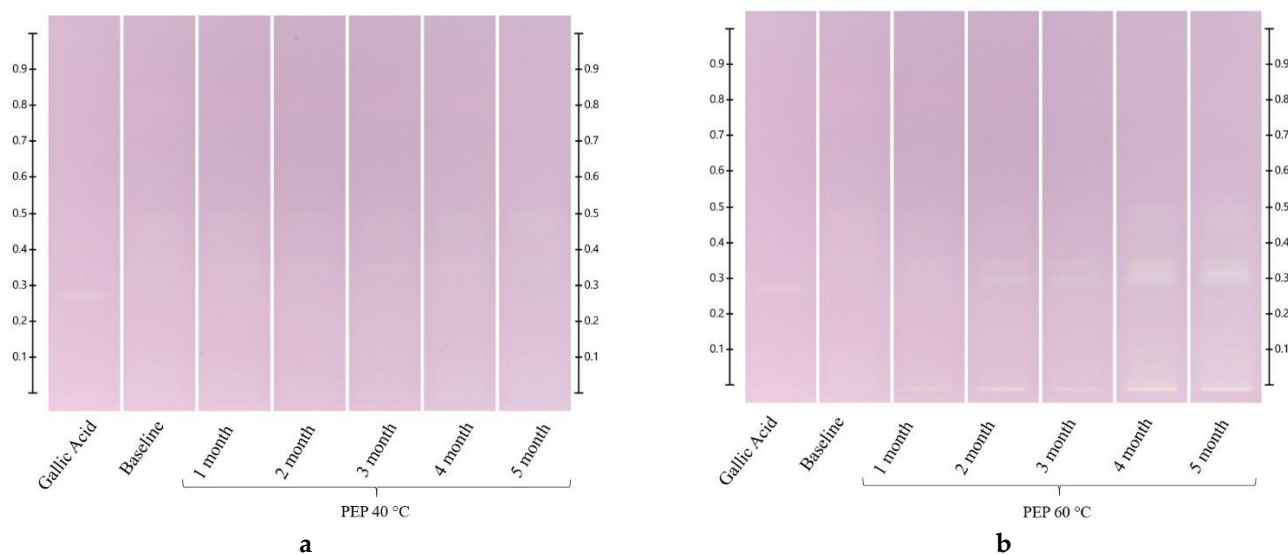

**Supplementary Figure S69.** HPTLC-DPPH fingerprints of PEP honey stored at 40 °C (**a**), and at 60 °C (**b**) for up to 5 months. Images of HPTLC plate were taken at White light after 60 min of derivatization with DPPH\* reagents; Gallic acid (4  $\mu$ L) and honey extracts (5  $\mu$ L) respectively.

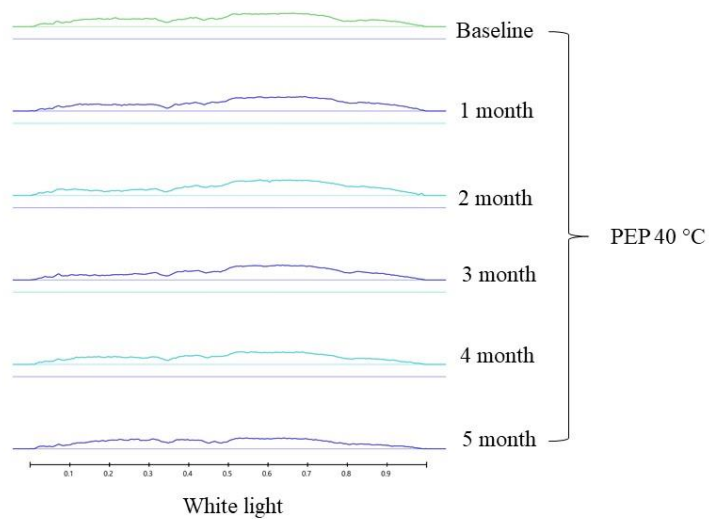

**Supplementary Figure S70.** Organic honey extract chromatograms (offset Y-axis values).



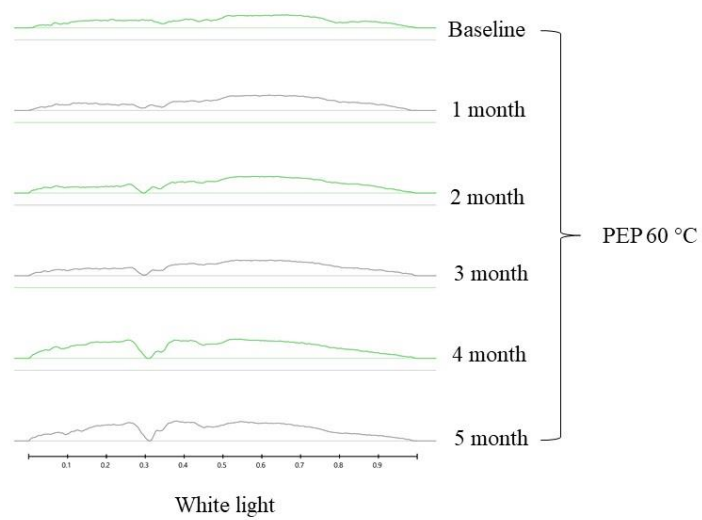

**Supplementary Figure S71.** Organic honey extract chromatograms (offset Y-axis values).
